# Supplementary material for: Modeling of discharges from Baltic Sea shipping
Source: Copernicus journal article supplement (doi:10.5194/os-2020-99), 2020-10-28
Supplement: Supplementary file 1 [file Jalkanen et al_Modeling_of_Discharges_from_Baltic_Sea_Shipping_2012_SummaryTable_STEAM.xlsx]

## Sheet: WorldPool_HELCOM_2012_summary_R
Totals:
		MESSAGES []	TRAVEL [km]	PAYLOAD [km*ton]	PersonDays []	SHIPS []	STERN_TUBE [l]	BalW [tonnes]	BILGE_W [l]	SCRUB_W_OPEN [l]	SCRUB_W_CLOSED [l]	GREY_W [l]	SEWAGE [l]	N_sewage [g]	N_foodWaste [g]	AFP_CuO [g]	AFP_CuPyr [g]	AFP_ZnO [g]	AFP_ZnPyr [g]	AFP_DCOIT [g]	AFP_Zineb [g]
All		266115728	134618544	912081160000	52810120	15447	3047633	393568192	288086400	1516821630	10669629	5294828000	1317938180	556271620	82365072	280788768	574983	55562224	1.08835e+06	370933	1.0683e+06
	IMO	162799936	116689936	908956270000	52810120	7902	2.42725e+06	393568192	222157184	1516821630	10669629	5294828000	1317938180	556271620	82365072	269424096	548988	52839564	1.03364e+06	352832	1.01974e+06
	MMSIonly	89296616	15591788	3126611970	0	5624	547051	0	56908048	0	0	0	0	0	0	9593749	21858.3	2283598	45827.5	15177.5	40808.4
	S/U	14020935	2.33802e+06	0	0	1921	73286.9	0	9025455	0	0	0	0	0	0	1.7835e+06	4156.98	441640	8922.98	2938.17	7782.8
Baltic Sea	Baltic Sea	124961355	7.90413e+07	5.4168e+11	2.53576e+07	0	1.43427e+06	1.2691e+08	1.44174e+08	9.69378e+08	5.33704e+06	2.82737e+09	7.06781e+08	2.96898e+08	4.20218e+07	1.24377e+08	254676	2.45525e+07	481292	164104	472675
Baltic Sea	Kattegat	70676837	2.65538e+07	1.91396e+11	1.11251e+07	0	706434	7.93237e+07	6.97311e+07	2.42691e+08	932289	7.52768e+08	1.88634e+08	7.95256e+07	1.219e+07	7.07827e+07	146561	1.4337e+07	282541	95860.6	273194
Baltic Sea	Gulf of Finland	37190040	1.4195e+07	1.22262e+11	8.57987e+06	0	462460	1.31782e+08	4.56384e+07	1.59198e+08	2.08168e+06	1.0205e+09	2.50811e+08	1.07347e+08	1.87618e+07	5.92018e+07	119746	1.14242e+07	222951	76334.5	221988
Baltic Sea	Gulf of Bothnia	26997876	1.238e+07	4.54805e+10	6.00352e+06	0	335639	3.80323e+07	2.14314e+07	1.45555e+08	1.90711e+06	6.06329e+08	1.48006e+08	6.314e+07	8.13809e+06	1.74472e+07	35807	3.50986e+06	67599.7	23015.7	66691.5
Baltic Sea	Gulf of Riga	6291851	2.44908e+06	1.12598e+10	1.74473e+06	0	108740	1.75218e+07	7.11663e+06	0	411513	8.78792e+07	2.37046e+07	9.36145e+06	1.25355e+06	8.99278e+06	18214.9	1.7414e+06	34010.7	11636.4	33790
Other	Other	0	0	0	0	0	0	0	0	0	0	0	0	0	0	0	0	0	0	0	0
Types:
		MESSAGES []	TRAVEL [km]	PAYLOAD [km*ton]	PersonDays []	SHIPS []	STERN_TUBE [l]	BalW [tonnes]	BILGE_W [l]	SCRUB_W_OPEN [l]	SCRUB_W_CLOSED [l]	GREY_W [l]	SEWAGE [l]	N_sewage [g]	N_foodWaste [g]	AFP_CuO [g]	AFP_CuPyr [g]	AFP_ZnO [g]	AFP_ZnPyr [g]	AFP_DCOIT [g]	AFP_Zineb [g]
RoPax_vessels		19479672	16943474	35248378000	39417152	241	374899	53103232	103907952	0	0	4149588990	874849730	422888448	42288808	13501551	34613	3840361	79295.4	25670.3	64624.8
Vehicle_carriers		6756539	8695440	60155605000	504450	290	68307.5	31776236	7637641	1515288320	541633	53080852	38316364	7136930	713692	14462549	30000.4	2.93121e+06	57616.6	19556.4	55800.9
Cargo_ships		53879440	44604060	268377162000	2236533	3725	1.24414e+06	102646376	34810564	0	0	233301024	168407536	31368220	3.13683e+06	98298584	198286	18943976	369678	126568	368327
Container_ships		14276472	15581300	153065275000	722111	692	231695	50753972	14097821	1.53332e+06	6.58489e+06	69975016	50511468	9408425	940844	35462684	70102.8	6591381	127605	43987.6	130084
Tankers		25148734	20205908	395232018000	1.29177e+06	1909	350385	145653808	21215392	0	3543107	108387384	37883996	16516178	1.65162e+06	92984880	184075	17315508	335624	115646	341527
Passenger_ships		9014517	2.1105e+06	0	3690700	241	72909.9	0	11645647	0	0	40650404	8570256	4.14272e+06	414271	808702	1926.69	207613	4183.32	1371.88	3604.27
Cruisers		1389646	1.38636e+06	0	4.01453e+06	101	9550.57	9636137	12207232	0	0	591250300	124652152	60254828	32763560	4678405	9575.9	926768	18185.1	6194.69	17818.1
Fishing_vessels		15852738	3.77005e+06	0	117301	509	131364	0	7914875	0	0	16233512	1.62335e+06	1.16998e+06	116998	1.93922e+06	4279.62	437857	8690.86	2901.66	7973.23
Service_ships		9069802	1.62763e+06	0	82752.3	339	40023.2	0	6148011	0	0	4333576	1.75609e+06	453184	45318.5	2.2622e+06	4991.14	509362	10151.3	3389.45	9296.59
Unknown		14020935	2.33802e+06	0	0	1921	73286.9	0	9025455	0	0	0	0	0	0	1.7835e+06	4156.98	441640	8922.98	2938.17	7782.8
Misc		97229120	17356366	0	733541	5479	450986	0	59481104	0	0	28045554	11364881	2932875	293287	14619311	32997.1	3419220	68440	22726.8	61499.1
============
weightClasses:
		MESSAGES []	TRAVEL [km]	PAYLOAD [km*ton]	PersonDays []	SHIPS []	STERN_TUBE [l]	BalW [tonnes]	BILGE_W [l]	SCRUB_W_OPEN [l]	SCRUB_W_CLOSED [l]	GREY_W [l]	SEWAGE [l]	N_sewage [g]	N_foodWaste [g]	AFP_CuO [g]	AFP_CuPyr [g]	AFP_ZnO [g]	AFP_ZnPyr [g]	AFP_DCOIT [g]	AFP_Zineb [g]
(GT_Below_4kt)		198708224	64950688	77052322000	10238302	10638	1.93608e+06	43643156	126625456	0	0	236947952	124643192	28872910	3.03906e+06	59431456	129206	13061508	259920	87079.6	240759
(GT_Between_4kt-10kt)		24043140	22322272	113876820000	3385118	1446	416419	53175048	26576786	0	3543107	147064976	73162848	18544384	2.01041e+06	43492164	88082.6	8444046	164789	56353.4	163619
(GT_Between_10kt-20kt)		16938684	17503496	156510372000	8341808	980	276849	62003144	31013810	0	6.58489e+06	729538690	190135296	77297344	8445956	45537012	92099.2	8811350	171949	58836.5	170999
(GT_Between_20kt-30kt)		12167472	14278582	167433667000	8724911	847	186301	71327976	35098504	1430178430	541633	1262258690	292197664	131036400	14438619	40124156	81896.8	7.88365e+06	154416	52690	152067
(GT_Between 30kt-45kt)		7236235	7654247	133093761000	12004695	761	129118	56185676	34495912	85109848	0	1597786370	350663072	163936544	20730022	33909744	68218.6	6494565	126584	43392.3	126599
(GT_Between_45kt-60kt)		3229869	3.95129e+06	82369323000	6536038	305	52610.2	34411132	19931564	0	0	782247940	168324512	80349144	10341340	18594014	37329.6	3.54679e+06	69072.5	23695.9	69253.7
(GT_Between 60kt-80kt		3007994	3224634	146770526000	1.98924e+06	258	39393.5	52712796	8039616	0	0	296955456	66128952	31379464	10140172	29832616	58490.5	5462118	105512	36472.4	108511
(GT_over_80kt)		784568	733232	34971841000	1.59085e+06	212	10789.8	20110722	6.30982e+06	1.53332e+06	0	242046960	52681216	24855646	13219608	9878801	19679	1.86059e+06	36147.3	12428.6	36523.7
============
Top flags
		MESSAGES []	TRAVEL [km]	PAYLOAD [km*ton]	PersonDays []	SHIPS []	STERN_TUBE [l]	BalW [tonnes]	BILGE_W [l]	SCRUB_W_OPEN [l]	SCRUB_W_CLOSED [l]	GREY_W [l]	SEWAGE [l]	N_sewage [g]	N_foodWaste [g]	AFP_CuO [g]	AFP_CuPyr [g]	AFP_ZnO [g]	AFP_ZnPyr [g]	AFP_DCOIT [g]	AFP_Zineb [g]
Sweden		52915204	15919564	38220591000	12829848	2920	426431	34535636	69540248	0	0	1189821820	261897328	122012760	14407368	16563297	38455.3	4.06007e+06	82196.6	27100.1	71879.9
Finland		25649744	11414083	48342548000	7480060	732	261038	32868214	24258370	0	10127996	577292860	135930896	59850744	6001995	12809440	26768	2.65048e+06	51332	17395.2	49799
United_Kingdom		10128301	8954931	74259988000	1.51854e+06	701	168699	31329296	11163508	0	0	190992848	57959800	20966022	6.37786e+06	20309988	41013.7	3921440	76559.1	26202.7	76187.4
Netherlands		14419925	12559246	52887355000	742885	1040	253963	20462760	10554370	1430178430	541633	82150192	44308940	10218217	2.13022e+06	19138132	38568.1	3.67932e+06	71760.9	24581.3	71607.4
Denmark		43408696	11834593	35436061000	6946324	1454	347627	25274342	41949756	85109848	0	374877952	85111808	38981136	3.89828e+06	20656398	45235.3	4605517	92282.7	30827.5	84534.3
Germany		22025570	8938619	27421925400	2.94236e+06	1883	174187	12565797	21768344	0	0	254821760	59351064	26384026	2758371	8616532	18579.3	1.85783e+06	36984.7	12427.1	34531
Liberia		4242478	4264903	103424442000	294648	523	72435.2	30576282	4.77103e+06	0	0	28722378	16417392	4.06963e+06	406963	24736366	48384.4	4507549	86985.9	30097.2	89729.2
Malta		7835756	7144077	68198224000	2.4489e+06	543	142919	26298144	9420741	0	0	349333984	86520400	36986136	7.64429e+06	20736784	41242.9	3.89559e+06	75645.6	26021.3	76554
Bahamas		4751754	4.46487e+06	31898259500	3.81641e+06	338	77672.8	21363606	11838047	0	0	577013120	128563848	59347192	11960981	12381030	24910.9	2371437	46218.1	15843.4	46224.2
Cyprus		7275065	7.07058e+06	54250185000	901855	322	128377	18619404	7.11047e+06	0	0	87176688	32657834	9979570	997958	15688550	31571.6	3.00866e+06	58647.7	20098.7	58614.2
Antigua_Barbuda		10139455	9803212	45613793000	416490	587	208525	17812140	6.7271e+06	0	0	44228248	31822838	5.94165e+06	594165	14201433	28653.6	2.73572e+06	53384.2	18279.6	53200.4
Norway		4878989	4105262	30049116200	1.11124e+06	547	71534.3	13669304	5407439	0	0	143705840	35114404	15309671	1.53097e+06	10035123	20355.9	1.95533e+06	38244.4	13066.7	37847.3
Panama		2919214	2.63956e+06	50697818000	477953	534	52623	15600869	3.57795e+06	0	0	64825712	21675848	7.18798e+06	2.84315e+06	13515963	26410.9	2.45964e+06	47454.6	16422.9	48991.2
Greece		1618092	1.58723e+06	78653014000	138006	159	24427.4	21765774	2.06741e+06	0	0	13668291	5.54917e+06	2.04563e+06	204563	16365794	31881.3	2.96252e+06	57095.4	19779.3	59142
Lithuania		2757852	1833621	5360666600	1.71478e+06	76	31078.9	3365448	5.88743e+06	0	0	261758640	56260008	26738106	2.67381e+06	1.00641e+06	2452.39	259866	5311.26	1741.59	4519.89
Estonia		5779091	1.63489e+06	1917126400	4.21995e+06	112	59837.1	5.27447e+06	12016538	0	0	468851648	98959520	47790736	4779076	872618	2353.63	260528	5417.57	1747.43	4318.26
Marshall_Islands		1727355	1.45836e+06	45055328000	330061	303	29943.2	15476903	2831877	0	0	29639964	9957241	3.46737e+06	1.07271e+06	10936854	21486.4	2.00967e+06	38850.5	13420.2	39863.5
Italy		858561	966045	12830190600	1.28026e+06	88	12521	5.92648e+06	3.5921e+06	0	0	196744560	42192756	20214476	7592267	3.56364e+06	7177.34	684655	13353.9	4574.63	13329.1
Russian_Federation		14397897	4678028	10602116100	505830	707	169815	5.42464e+06	10845847	0	0	26645294	14120211	3236736	324622	7384628	16383	1.65624e+06	33172.6	11085	30319.2
China		1010666	1.03082e+06	29280510000	75061	232	20226.2	8350743	1.16462e+06	0	0	7906068	5.29875e+06	1.08266e+06	108266	6.80113e+06	13221.9	1.22608e+06	23608.5	8185.44	24519.8
Singapore		974854	943438	17075115000	71294.9	189	14841.9	6.29881e+06	984593	1.53332e+06	0	6156257	3.60862e+06	858632	85863.1	4.70007e+06	9188.58	855705	16510.3	5713.52	17040.5
Latvia		5008145	1.36277e+06	961543100	1.43374e+06	134	44321.1	2.50405e+06	5.17218e+06	0	0	218507040	46182420	22218328	2.22183e+06	678991	1661.95	176675	3615.01	1184.15	3064.89
Saint_Vincent_and_the_Grenadines		3241261	2.02237e+06	4039539710	137606	108	63235.9	1.92906e+06	2.04614e+06	0	0	12194840	8210554	1.58375e+06	158375	2.905e+06	6259.9	628273	12521.8	4203.87	11665.9
Portugal		715054	741622	3030175740	108250	59	10475.2	1.88253e+06	714565	0	0	15107694	3868982	1.65488e+06	730655	1.17202e+06	2351.84	223580	4354.59	1493.74	4365.52
Croatia		230045	259159	10453784600	16667.6	12	4328.91	2444653	230700	0	0	1.82304e+06	1.26755e+06	247446	24744.5	1.76203e+06	3418.88	316588	6091.81	2113.49	6340.46
Other_landlocked		480921	430145	4142750980	24639.5	98	6647.32	1194030	388356	0	0	1954301	1032497	269275	26927.5	1.00075e+06	2002.97	190226	3702.62	1270.84	3719.89
Poland		11044325	2.8102e+06	510795584	452472	458	77857.1	797268	7749217	0	0	31481392	7.20375e+06	3.15533e+06	315533	1.23961e+06	2944.07	308756	6280.96	2068.62	5438.89
USA		272947	347776	3150792450	15297.3	25	4259.54	1.12687e+06	270613	0	0	1.70272e+06	1193515	225578	22557.8	817018	1621.49	153024	2969.93	1022.13	3011.01
Belgium		557341	462556	1794659710	21352.7	54	9389.61	804092	365569	0	0	2133881	1.40583e+06	283490	28349	963981	1923.79	182051	3538.61	1216.13	3569.59
Seychelles		79115	110455	2446532610	5120.14	4	954.206	450807	73560.1	0	0	519173	181463	79112.1	7911.2	388053	761.022	70990.4	1370.97	474.028	1410.77
============
Months:
		MESSAGES []	TRAVEL [km]	PAYLOAD [km*ton]	PersonDays []	SHIPS []	STERN_TUBE [l]	BalW [tonnes]	BILGE_W [l]	SCRUB_W_OPEN [l]	SCRUB_W_CLOSED [l]	GREY_W [l]	SEWAGE [l]	N_sewage [g]	N_foodWaste [g]	AFP_CuO [g]	AFP_CuPyr [g]	AFP_ZnO [g]	AFP_ZnPyr [g]	AFP_DCOIT [g]	AFP_Zineb [g]
January		16777216	9847164	72110080000	3.92362e+06	4972	224538	30602806	17713928	160614656	1.09437e+06	401593248	100318752	42302344	4357458	21045458	43170.2	4.09786e+06	81594.4	27182.9	80275.9
February		16777216	9334170	65174372000	3.53233e+06	4762	208540	29341770	17011322	162213536	1.06508e+06	364528576	91822976	38374400	3.95571e+06	19799058	40757.5	3876781	77570.5	25818.3	75810.4
March		16777216	10769358	74559513000	3.80244e+06	5293	221662	33094896	17490242	141283664	1.18282e+06	395926656	99805328	41669532	4294292	21748272	44024.7	4.17617e+06	82485.4	27448.6	81968.3
April		16777216	10446637	73032810000	3.81259e+06	6211	219550	31954704	17708024	157031232	1.06203e+06	399847584	99719976	42012212	4.492e+06	20633502	42220.2	4.01395e+06	80098	26647.5	78592.9
May		16777216	11674236	76245500000	4.49811e+06	7772	232571	34059924	20180012	154169664	962376	492374080	119331584	51400808	9356951	22469784	45990.5	4.36521e+06	86697.7	28838.7	85464
June		16777216	11944868	73504645000	4.58219e+06	8362	238558	33305218	21006982	124912616	725829	513164960	123861296	53503316	11140630	22090492	45133.9	4.31102e+06	85428.2	28485.8	84072.9
July		16777216	12658938	75601117000	4.34402e+06	8783	246320	34145444	21461708	98614432	651650	513120736	123855112	53487216	11676804	23040634	47011.3	4.50004e+06	88258	29846.7	87032.2
August		16777216	12155837	76687892000	4443158	8556	235340	35481972	21053352	135786352	632858	524515744	126251184	54670820	11989020	22985940	46829.6	4.44298e+06	87779.6	29373	86770.6
September		16777216	10890240	76440265000	3.79103e+06	7643	221511	32519380	18604078	116022208	625079	416979520	102985632	43633968	6.78576e+06	21465462	43800.3	4.16672e+06	82527.9	27824.8	81476.1
October		16777216	10947678	76439585000	3.72084e+06	6854	234306	33703972	18091338	7287775	884014	393685856	99034032	41438520	4331328	22145548	45116.9	4313372	85575.4	28617.7	83939.5
November		16777216	10552162	75913683000	3.7546e+06	5931	229804	33594532	17647874	123767288	933734	387038592	97698952	40718856	4.20628e+06	22412880	45506.5	4.34438e+06	85856	28915.8	84548.8
December		16777216	9883876	71659020000	4.03582e+06	5406	234697	31763532	17974902	135114048	849753	395854368	99842760	41711448	4.50408e+06	21592996	44600.8	4.2552e+06	84575.6	28514.2	82520.7
============
