# Supplementary material for: Modeling of discharges from Baltic Sea shipping
Source: Copernicus journal article supplement (doi:10.5194/os-2020-99), 2020-10-28
Supplement: Supplementary file 2 [file Jalkanen_et_al_Modeling_of_Discharges_from_Baltic_Sea_Shipping_Water_Analysis_Review.xlsx]

## Sheet: info
Pink color codes indicate measurements below Limit of quantification (LOQ) or Limit of detecion (LOD).
Half of the reported LOD or LOQ was used in the analyze. If no LOD or LOQ was available, a 0 was used.

## Sheet: AF international
Product_name	Company	Paint_type	Active_substance	Substance_code	CAS	Leaching_rate(value)	Leaching_rate(unit)	Reference	Method	Use	Comment
Anonymous, due to non-disclosure agreement	Anonymous		Copper compound	S00		28.6	microg/cm2/day	1
Anonymous, due to non-disclosure agreement	Anonymous		Copper compound	S00		23.8	microg/cm2/day	1
ABC 3	PPG architectural finishes inc	Self-polishing	Ziram			2.57	microg/cm2/day	2
ABC 3	PPG architectural finishes inc	Self-polishing	Copper(I)oxide	S00	1317-39-1	19.35	microg/cm2/day	2
Anonymous, due to non-disclosure agreement	Anonymous		Copper compound	S00		31.8	microg/cm2/day	1
Anonymous, due to non-disclosure agreement	Anonymous		Copper compound	S00		15.3	microg/cm2/day	1
Anonymous, due to non-disclosure agreement	Anonymous		Copper compound	S00		34.7	microg/cm2/day	1
Anonymous, due to non-disclosure agreement	Anonymous		Copper compound	S00		18.6	microg/cm2/day	1
Anonymous, due to non-disclosure agreement	Anonymous		Copper compound	S00		27.7	microg/cm2/day	1
Anonymous, due to non-disclosure agreement	Anonymous	Self-polishing	Copper(I)oxide	S00	1317-39-1	20.4	microg/cm2/day	1	ISO 10890:2010 Paints and Varnishes – Modeling of Biocides Release Rate from Antifouling Paints by Mass Balance Calculation	Professional use only
Anonymous, due to non-disclosure agreement	Anonymous	Self-polishing	Copper(I)oxide	S00	1317-39-1	20.2	microg/cm2/day	1	ISO 10890:2010 Paints and Varnishes – Modeling of Biocides Release Rate from Antifouling Paints by Mass Balance Calculation	Professional use only
Anonymous, due to non-disclosure agreement	Anonymous		Copper compound	S00		15.4	microg/cm2/day	1			BLUE 3GEBLU, DARK RED 3GEDRD, BLACK 3GE099
Antifouling SeaSafe	Jotun paints inc		copper oxide or copper thiocyanate?	S00		7.48	microg/cm2/day	2
Antifouling SeaSafe Ultra	Jotun paints inc	Self-polishing	Sea nine	S04	64359-81-5	0.48	microg/cm2/day	2
Antifouling SeaSafe Ultra	Jotun paints inc	Self-polishing	copper oxide or copper thiocyanate?	S00		6.62	microg/cm2/day	2
Antifouling Seavictor 50			Sea nine	S04	64359-81-5	0.88	microg/cm2/day	2
Antifouling Seavictor 50			Thiram	S07	137-26-8	1.94	microg/cm2/day	2
Anonymous, due to non-disclosure agreement	Anonymous		Copper compound	S00		26.4	microg/cm2/day	1
Awlcraft	International paint	Self-polishing	Diuron			3.76	microg/cm2/day	2
Awlcraft	International paint	Self-polishing	copper oxide or copper thiocyanate?	S00		40.12	microg/cm2/day	2
Anonymous, due to non-disclosure agreement	Anonymous		Copper compound	S00		30.3	microg/cm2/day	1
Anonymous, due to non-disclosure agreement	Anonymous		Copper compound	S00		59.3	microg/cm2/day	1			BP201 CHARCOAL BLACK, BP401 MEDIUM GREEN, BP501 LIGHT BLUE, BP502 DEEP BLUE, BP701 RED
AYB#10	Altex		Octhilinone			0.31	microg/cm2/day	2
AYB#10	Altex		Copper(I)oxide	S00	1317-39-1	8.25	microg/cm2/day	2
AYB#5	Altex	Self-polishing	Copper(I)oxide	S00	1317-39-1	24.8	microg/cm2/day	2
Biltema Antifouling	Boero Bartolomeo		Copper(I)oxide	S00	1317-39-1	7	microg/cm2/day	4	Leaching, CEPE	Amateur and professional use
Anonymous, due to non-disclosure agreement	Anonymous		Copper compound	S00		34.7	microg/cm2/day	1
Anonymous, due to non-disclosure agreement	Anonymous		Copper compound	S00		28.1	microg/cm2/day	1
Anonymous, due to non-disclosure agreement	Anonymous		Copper compound	S00		20.3	microg/cm2/day	1
Coppercoat Extra	International paint	Self-polishing	Diuron			2.69	microg/cm2/day	2
Coppercoat Extra	International paint	Self-polishing	copper oxide or copper thiocyanate?	S00		28.35	microg/cm2/day	2
Coppercoat Marine Antifouling Paint			copper oxide or copper thiocyanate?	S00		11.57	microg/cm2/day	2
Anonymous, due to non-disclosure agreement	Anonymous		Copper compound	S00		23	microg/cm2/day	1
Anonymous, due to non-disclosure agreement	Anonymous		Copper compound	S00		28.7	microg/cm2/day	1			K70 RED, K75 BLUE, K76 BLACK
Anonymous, due to non-disclosure agreement	Anonymous		Copper compound	S00		31	microg/cm2/day	1			K50 RED, K51 BLUE, K53 GREEN, K52 BLACK
Anonymous, due to non-disclosure agreement	Anonymous		Copper compound	S00		31.9	microg/cm2/day	1
Anonymous, due to non-disclosure agreement	Anonymous		Copper compound	S00		20	microg/cm2/day	1
Anonymous, due to non-disclosure agreement	Anonymous		Copper compound	S00		32	microg/cm2/day	1			4490B RED, 5590B GREEN, 6690B BLUE, 6696B DARK BLUE, 7740B GRAY WHITE, 7790B BLACK, 8890B BROWN
Anonymous, due to non-disclosure agreement	Anonymous		Copper compound	S00		60.6	microg/cm2/day	1			YBA549 RED, YBA579 BLACK, YBA 569 BLUE, YBA559 GREEN
Anonymous, due to non-disclosure agreement	Anonymous		Copper compound	S00		24.6	microg/cm2/day	1
Anonymous, due to non-disclosure agreement	Anonymous		Copper compound	S00		18.9	microg/cm2/day	1
Anonymous, due to non-disclosure agreement	Anonymous		Copper compound	S00		31.7	microg/cm2/day	1			449B RED, 559B GREEN, 669B BLUE, 779B BLACK
Anonymous, due to non-disclosure agreement	Anonymous		Copper compound	S00		28	microg/cm2/day	1
Globic	Hempel A/S		Sea nine	S04	64359-81-5	0.8	microg/cm2/day	2
Globic	Hempel A/S		copper oxide or copper thiocyanate?	S00		13.42	microg/cm2/day	2
HEMPEL'S A/F GLOBIC NCT 8195M (19990 (czarny), 37000 (niebieski), 58000 (czerwony), 62900 (brązowy))	Hempel		Sea Nine	S04	64359-81-5	0.77	microg/cm2/day	2		Professional use only
HEMPEL'S A/F GLOBIC NCT 8195M (19990 (czarny), 37000 (niebieski), 58000 (czerwony), 62900 (brązowy))	Hempel		Thiram	S07	137-26-8	1.94	microg/cm2/day	2		Professional use only
HEMPEL'S A/F GLOBIC NCT 8195M (19990 (czarny), 37000 (niebieski), 58000 (czerwony), 62900 (brązowy))	Hempel		copper oxide or copper thiocyanate?	S00		13.73	microg/cm2/day	2		Professional use only
Hempel's Antifouling Globic NCT 8190M			DCOIT	S04	64359-81-5	0.77	microg/cm2/day	2		Professional use only
Hempel's Antifouling Globic NCT 8190M			Thiram	S07	137-26-8	1.94	microg/cm2/day	2		Professional use only
Hempel's Antifouling Globic NCT 8190M			Copper(I)oxide	S00	1317-39-1	13.73	microg/cm2/day	2		Professional use only
Hempel's Antifouling Olympic 86951			Zinc oxide	S06	1314-13-2	2	microg/cm2/day	3		Professional use only
Hempel's Antifouling Olympic 86951			Zinc oxide	S06	1314-13-2	2.9	microg/cm2/day	4	Leaching, CEPE	Professional use only
Hempel's Antifouling Olympic 86951			Copper(I)oxide	S00	1317-39-1	3.6	microg/cm2/day	3		Professional use only
Hempel's Antifouling Olympic 86951			Zinc oxide	S06	1314-13-2	5.6	microg/cm2/day	3		Professional use only
Hempel's Antifouling Olympic 86951			Copper(I)oxide	S00	1317-39-1	8.9	microg/cm2/day	4	Leaching, CEPE	Professional use only
Hempel's Antifouling Olympic 86951			Copper(I)oxide	S00	1317-39-1	13	microg/cm2/day	3		Professional use only
Hempel's Antifouling Olympic 86951			Copper(I)oxide	S00	1317-39-1	28.26	microg/cm2/day	2		Professional use only
Hydrocoat			copper oxide or copper thiocyanate?	S00		15.25	microg/cm2/day	2
Anonymous, due to non-disclosure agreement	Anonymous		Copper compound	S00		15.3	microg/cm2/day	1
Interclene 165	International paint		Diuron			1.54	microg/cm2/day	2
Interclene 165	International paint		copper oxide or copper thiocyanate?	S00		15.85	microg/cm2/day	2
Interclene 175	International paint		Zineb	S05	12122-67-7	2.43	microg/cm2/day	2
Interclene 175	International paint		copper oxide or copper thiocyanate?	S00		20.66	microg/cm2/day	2
Anonymous, due to non-disclosure agreement	Anonymous		Copper compound	S00		18.1	microg/cm2/day	1			BCA449 A/F RED, BCA779 A/F BLACK
Anonymous, due to non-disclosure agreement	Anonymous		Copper compound	S00		19.8	microg/cm2/day	1			BRA570 RED, BRA572 BLACK
Anonymous, due to non-disclosure agreement	Anonymous		Copper compound	S00		11.4	microg/cm2/day	1			BLACK BCA 172/5, RED BCA 170/5
Intersmooth 360	International paint	Self-polishing	Zinc pyrithione	S03	13463-41-7	3.51	microg/cm2/day	2
Intersmooth 360	International paint	Self-polishing	copper oxide or copper thiocyanate?	S00		34.02	microg/cm2/day	2
Anonymous, due to non-disclosure agreement	Anonymous		Copper compound	S00		29	microg/cm2/day	1			DARK BROWN BEA368/5, DARK RED BEA369/5
Anonymous, due to non-disclosure agreement	Anonymous		Copper compound	S00		29	microg/cm2/day	1			BLACK BEA461/5, BLUE BEA462/5, DARK BRWON BEA468/5, DARK RED BEA469/5
Interspeed 5617			Zinc oxide	S06	1314-13-2	4.7	microg/cm2/day	4	Leaching, CEPE	Professional use only
Interspeed 5617			Copper(I)oxide	S00	1317-39-1	14.6	microg/cm2/day	4	Leaching, CEPE	Professional use only
Anonymous, due to non-disclosure agreement	Anonymous		Copper compound	S00		11.4	microg/cm2/day	1			RED BQA654/5GL, BLACK BQA659/5GL
Anonymous, due to non-disclosure agreement	Anonymous		Copper compound	S00		21.5	microg/cm2/day	1			BRA640 RED, BRA641 BLUE, BRA642 BLACK, BRA643 GREEN, BRA644 OCEAN GRAY
Anonymous, due to non-disclosure agreement	Anonymous		Copper compound	S00		20.8	microg/cm2/day	1			BLACK BQA679/5GL, RED BQA674/5GL
Interspeed 642	International paint	Self-polishing	Diuron			2.57	microg/cm2/day	2
Interspeed 642 (OSCAR#3592)	International paint	Self-polishing	copper oxide or copper thiocyanate?	S00		27.28	microg/cm2/day	2
Micron 66	Interlux	Self-polishing	Zinc pyrithione	S03	13463-41-7	2.34	microg/cm2/day	2
Micron 66	Interlux	Self-polishing	copper oxide or copper thiocyanate?	S00		22.68	microg/cm2/day	2
Anonymous, due to non-disclosure agreement	Anonymous		Copper compound	S00		26.6	microg/cm2/day	1			YBA470 BLUE, YBA471 GREEN, YBA472 RED, YBA473 BLACK
Micron 77	International paint		Copper pyrithione	S01	14915-37-8	2.42	microg/cm2/day	2
Micron 77	International paint		copper oxide or copper thiocyanate?	S00		21.84	microg/cm2/day	2
Anonymous, due to non-disclosure agreement	Anonymous		Copper compound	S00		40.1	microg/cm2/day	1
Anonymous, due to non-disclosure agreement	Anonymous		Copper compound	S00		20.1	microg/cm2/day	1
Micron Extra	International paint		Dichlofluanid			1.24	microg/cm2/day	2
Micron Extra	International paint		copper oxide or copper thiocyanate?	S00		8.41	microg/cm2/day	2
Anonymous, due to non-disclosure agreement	Anonymous		Copper compound	S00		27.8	microg/cm2/day	1			5690 BLUE, 5691 GREEN, 5692 RED, 5693 BLACK, 5694 SHARK WHITE, 5695 BROWN, 5696 DARK BLUE
Anonymous, due to non-disclosure agreement	Anonymous		Copper compound	S00		24.6	microg/cm2/day	1			5790 BLUE, 5791 GREEN, 5792 RED, 5793 BLACK, 5794 SHARK WHITE
Micron Extra(3616)	International paint		copper oxide or copper thiocyanate?	S00		25.31	microg/cm2/day	2
Anonymous, due to non-disclosure agreement	Anonymous		Copper compound	S00		32	microg/cm2/day	1
Mille Xtra	Hempel A/S		Zinc oxide	S06	1314-13-2	6.8	microg/cm2/day	4	Leaching, CEPE	Amateur and professional use
Mille Xtra	Hempel A/S		Copper(I)oxide	S00	1317-39-1	18.4	microg/cm2/day	4	Leaching, CEPE	Amateur and professional use
Olympic 86901			copper oxide or copper thiocyanate?	S00		27.1	microg/cm2/day	2
Anonymous, due to non-disclosure agreement	Anonymous		Copper compound	S00		28.2	microg/cm2/day	1			19990 BLACK, 30240 BRIGHT BLUE, 50300 LIGHT RED, 51110 RED
Anonymous, due to non-disclosure agreement	Anonymous		Copper compound	S00		27.8	microg/cm2/day	1
Anonymous, due to non-disclosure agreement	Anonymous		Copper compound	S00		18.1	microg/cm2/day	1
Anonymous, due to non-disclosure agreement	Anonymous		Copper compound	S00		17.6	microg/cm2/day	1			1240 BLUE, 1340 GREEN, 1640 RED, 1840 BLACK
Anonymous, due to non-disclosure agreement	Anonymous		Copper compound	S00		32.2	microg/cm2/day	1
Anonymous, due to non-disclosure agreement	Anonymous		Copper compound	S00		44.6	microg/cm2/day	1
Anonymous, due to non-disclosure agreement	Anonymous		Copper compound	S00		28.2	microg/cm2/day	1
Anonymous, due to non-disclosure agreement	Anonymous		Copper compound	S00		26.4	microg/cm2/day	1
Anonymous, due to non-disclosure agreement	Anonymous		Copper compound	S00		26.4	microg/cm2/day	1
Anonymous, due to non-disclosure agreement	Anonymous		Copper compound	S00		40.1	microg/cm2/day	1
Anonymous, due to non-disclosure agreement	Anonymous		Copper compound	S00		28.3	microg/cm2/day	1			1878 BLACK, 1378 GREEN, 1278 BLUE
Anonymous, due to non-disclosure agreement	Anonymous		Copper compound	S00		15.4	microg/cm2/day	1
Anonymous, due to non-disclosure agreement	Anonymous		Copper compound	S00		8.54	microg/cm2/day	1
Anonymous, due to non-disclosure agreement	Anonymous		Copper compound	S00		4.8	microg/cm2/day	1
Anonymous, due to non-disclosure agreement	Anonymous		Copper compound	S00		28.2	microg/cm2/day	1
Anonymous, due to non-disclosure agreement	Anonymous		Copper compound	S00		28.7	microg/cm2/day	1			BLACK NAU993, BLUE NAU990, RED NAU 992
Anonymous, due to non-disclosure agreement	Anonymous		Copper compound	S00		45	microg/cm2/day	1			BLACK NAU883, RED NAU882, BLUE NAU880
Anonymous, due to non-disclosure agreement	Anonymous		Copper compound	S00		52.4	microg/cm2/day	1
Anonymous, due to non-disclosure agreement	Anonymous		Copper compound	S00		42	microg/cm2/day	1
Anonymous, due to non-disclosure agreement	Anonymous		Copper compound	S00		52.4	microg/cm2/day	1
Anonymous, due to non-disclosure agreement	Anonymous		Copper compound	S00		42	microg/cm2/day	1
Anonymous, due to non-disclosure agreement	Anonymous		Copper compound	S00		65.2	microg/cm2/day	1
Anonymous, due to non-disclosure agreement	Anonymous		Copper compound	S00		19.9	microg/cm2/day	1
Sea Barrier 1000	Carboline	Self-polishing	copper oxide or copper thiocyanate?	S00		24.8	microg/cm2/day	2
Sea Barrier 3000	Carboline	Self-polishing	Copper oxide	S00		24.8	microg/cm2/day	2
Sea Barrier 4000	Carboline	Semi-hard, semi-ablative	Octhilinone			1.1	microg/cm2/day	2
Sea Barrier 4000	Carboline	Semi-hard, semi-ablative	Copper oxide	S00		33.23	microg/cm2/day	2
Sea Barrier Alloy 100	Carboline		Diuron			1.72	microg/cm2/day	2			Sea Barrier Alloy 100 PLUS suspends this product with new formula, seen 2016-04-19
Sea Barrier Alloy 100	Carboline		copper oxide or copper thiocyanate?	S00		4.46	microg/cm2/day	2			Sea Barrier Alloy 100 PLUS suspends this product with new formula, seen 2016-04-19
Sea Barrier Extend			Zinc pyrithione	S03	13463-41-7	1.24	microg/cm2/day	2
Sea Barrier Extend			copper oxide or copper thiocyanate?	S00		26.8	microg/cm2/day	2
Sea Force 60 (Spl)	Jotun A/S	Self-polishing	Copper pyrithione	S01	14915-37-8	0.46	microg/cm2/day	2		Professional use only
Sea Force 60 (Spl)	Jotun A/S	Self-polishing	Copper(I)oxide	S00	1317-39-1	9.1	microg/cm2/day	2		Professional use only
Anonymous, due to non-disclosure agreement	Anonymous		Copper compound	S00		16.4	microg/cm2/day	1
Anonymous, due to non-disclosure agreement	Anonymous		Copper compound	S00		30.9	microg/cm2/day	1
Anonymous, due to non-disclosure agreement	Anonymous		Copper compound	S00		50.4	microg/cm2/day	1
Anonymous, due to non-disclosure agreement	Anonymous		Copper compound	S00		24.5	microg/cm2/day	1
Anonymous, due to non-disclosure agreement	Anonymous		Copper compound	S00		42.4	microg/cm2/day	1
SeaForce 30 (DARK RED, LIGHT RED)	Jotun paint		Zineb	S05	12122-67-7	2.31	microg/cm2/day	2		Professional use only
SeaForce 30 (DARK RED, LIGHT RED)	Jotun paint	Hydrolysing	copper oxide or copper thiocyanate?	S00		9.78	microg/cm2/day	2		Professional use only
SeaForce 60			Zineb	S05	12122-67-7	1.52	microg/cm2/day	2		Professional use only
SeaForce 90	Jotun A/S	Hydrolysing	Copper pyrithione	S01	14915-37-8	0.5	microg/cm2/day	2
SeaForce 90	Jotun A/S	Hydrolysing	Copper(I)oxide	S00	1317-39-1	11.96	microg/cm2/day	2
Anonymous, due to non-disclosure agreement	Anonymous		Copper compound	S00		28.2	microg/cm2/day	1
Seaguardian	Jotun A/S	Self-polishing	Copper(I)oxide	S00	1317-39-1	18.23	microg/cm2/day	2		Professional use only
SeaQuantum Classic S	Jotun A/S	Self-polishing	Copper pyrithione	S01	14915-37-8	0.61	microg/cm2/day	2		Professional use only
SeaQuantum Classic S	Jotun A/S	Self-polishing	Copper(I)oxide	S00	1317-39-1	18.48	microg/cm2/day	2		Professional use only
SeaQuantum Ultra S (DARK RED, LIGHT RED)	Jotun paint		Copper pyrithione	S01	14915-37-8	1.96	microg/cm2/day	2		Professional use only
SeaQuantum Ultra S (DARK RED, LIGHT RED)	Jotun paint		copper oxide or copper thiocyanate?	S00		22.6	microg/cm2/day	2		Professional use only
SeaSafe	Jotun A/S		Zineb	S05	12122-67-7	2.55	microg/cm2/day	2
SeaVictor 40			copper oxide or copper thiocyanate?	S00		16.25	microg/cm2/day	2
Anonymous, due to non-disclosure agreement	Anonymous		Copper compound	S00		15.3	microg/cm2/day	1
Anonymous, due to non-disclosure agreement	Anonymous		Copper compound	S00		15.3	microg/cm2/day	1
Sigma Ecofleet 290	PPG Protective and Marine Coatings	Self-polishing	Diuron	S09	330-54-1	1.57	microg/cm2/day	2
Sigma Ecofleet 290	PPG Coatings		copper oxide or copper thiocyanate?	S00		12.25	microg/cm2/day	2
Anonymous, due to non-disclosure agreement	Anonymous		Copper oxide or copper hydroxide or cuprous thiocyanate?	S00		23.9	microg/cm2/day	1		Professional use only
Anonymous, due to non-disclosure agreement	Anonymous		Copper compound	S00		30	microg/cm2/day	1			K64B GREEN, K60B RED, K61B BLUE, K62B BLACK
Anonymous, due to non-disclosure agreement	Anonymous		Copper compound	S00		48.5	microg/cm2/day	1			K60 RED, K61 BLUE, K62 BALCK, K64 GREEN
Anonymous, due to non-disclosure agreement	Anonymous		Copper compound	S00		66.5	microg/cm2/day	1			K90 RED, K91 BLUE, K93 BLACK, K94 GREEN
Anonymous, due to non-disclosure agreement	Anonymous		Copper compound	S00		66.4	microg/cm2/day	1			K94B GREEN, K90B RED, K91B BLUE, K93B BLACK
Anonymous, due to non-disclosure agreement	Anonymous		Copper compound	S00		25.6	microg/cm2/day	1			BLACK NAU773, BLUE NAU770, RED NAU772
Trilux			Dichlofluanid	S08	1085-98-9	2.33	microg/cm2/day	2
Trilux			copper oxide or copper thiocyanate?	S00		7.16	microg/cm2/day	2
Trilux 33			Zinc pyrithione	S03	13463-41-7	2.42	microg/cm2/day	2		Professional use only
Anonymous, due to non-disclosure agreement	Anonymous		Copper thiocyanate	S00	1111-67-7	4.71	microg/cm2/day	1		Professional use only
Anonymous, due to non-disclosure agreement	Anonymous	Polishing	Copper thiocyanate	S00	1111-67-7	5.4	microg/cm2/day	1		Professional use only
Trilux 33			Copper thiocyanate	S00	1111-67-7	6.32	microg/cm2/day	2		Professional use only
Anonymous, due to non-disclosure agreement	Anonymous		Copper compound	S00		2.11	microg/cm2/day	1			498A WHITE, 493A, BLACK
Anonymous, due to non-disclosure agreement	Anonymous		Copper compound	S00		12.6	microg/cm2/day	1
Ultra	International paint LLC	Hard	Dichlofluanid	S08	1085-98-9	1.89	microg/cm2/day	2
Ultra	International paint LLC	Hard	Copper oxide	S00		11.91	microg/cm2/day	2
Anonymous, due to non-disclosure agreement	Anonymous		Copper compound	S00		26.3	microg/cm2/day	1
Anonymous, due to non-disclosure agreement	Anonymous		Copper compound	S00		51.2	microg/cm2/day	1			3449 RED, 3559 GREEN, 3669 BLUE, 3779, BLACK
Anonymous, due to non-disclosure agreement	Anonymous		Copper compound	S00		33.2	microg/cm2/day	1
Anonymous, due to non-disclosure agreement	Anonymous		Copper compound	S00		46	microg/cm2/day	1
Anonymous, due to non-disclosure agreement	Anonymous		Copper compound	S00		40.5	microg/cm2/day	1			2779N BLACK, 2669N BLUE
VC Offshore	Interlux	Hard	copper oxide or copper thiocyanate?	S00		21.87	microg/cm2/day	2
Anonymous, due to non-disclosure agreement	Anonymous		Copper compound	S00		61	microg/cm2/day	1
Anonymous, due to non-disclosure agreement	Anonymous		Copper compound	S00		16.9	microg/cm2/day	1
Anonymous, due to non-disclosure agreement	Anonymous		Copper compound	S00		15	microg/cm2/day	1
Anonymous, due to non-disclosure agreement	Anonymous		Copper compound	S00		5.32	microg/cm2/day	1
Anonymous, due to non-disclosure agreement	Anonymous		Copper compound	S00		8.54	microg/cm2/day	1
Anonymous, due to non-disclosure agreement	Anonymous		Copper compound	S00		15.4	microg/cm2/day	1
Vivid	Pettit Marine	Ablative/Hard	Zinc pyrithione	S03	13463-41-7	1.11	microg/cm2/day	2
VIVID	Pettit Marine	Ablative/Hard	copper oxide or copper thiocyanate?	S00		6.03	microg/cm2/day	2
Anonymous, due to non-disclosure agreement	Anonymous		Copper compound	S00		23	microg/cm2/day	1
Anonymous, due to non-disclosure agreement	Anonymous		Copper compound	S00		15.4	microg/cm2/day	1
Anonymous, due to non-disclosure agreement	Anonymous		Copper compound	S00		26.2	microg/cm2/day	1
Anonymous, due to non-disclosure agreement	Anonymous		Copper compound	S00		40.1	microg/cm2/day	1
Anonymous, due to non-disclosure agreement	Anonymous		Copper compound	S00		28.3	microg/cm2/day	1			B-94 BLACK, B-93 GREEN, B-91 BLUE
					counts	184
					average	19.9088
					Stdev	15.3078
					95% CI low	17.697
					95% CI high	22.1206

## Sheet: AF Kattegatt
Product_name	Company	Paint_type	Lifetime	Active_substance	Substance_code	CAS	Leaching_rate(value)	Leaching_rate(unit)	Reference	Method	Use	Comment
Sea Force 60 (Spl)	Jotun A/S	Self-polishing		Copper pyrithione	S01	14915-37-8	0.46	microg/cm2/day	2		Professional use only
SeaQuantum Classic S	Jotun A/S	Self-polishing		Copper pyrithione	S01	14915-37-8	0.61	microg/cm2/day	2		Professional use only
Hempel's Antifouling Globic NCT 8190M				DCOIT	S04	64359-81-5	0.77	microg/cm2/day	2		Professional use only
HEMPEL'S A/F GLOBIC NCT 8195M (19990 (czarny), 37000 (niebieski), 58000 (czerwony), 62900 (brązowy))	Hempel			Sea Nine	S04	64359-81-5	0.77	microg/cm2/day	2		Professional use only
Mille Light Copper				Copper(I)oxide	S00	1317-39-1	1.5	microg/cm2/day	4	Leaching, CEPE	Amateur and professional use
SeaForce 60				Zineb	S05	12122-67-7	1.52	microg/cm2/day	2		Professional use only
Sigma Ecofleet 290	PPG Coatings			Diuron	S09	330-54-1	1.57	microg/cm2/day	2
Hempel's Antifouling Globic NCT 8190M				Thiram	S07	137-26-8	1.94	microg/cm2/day	2		Professional use only
HEMPEL'S A/F GLOBIC NCT 8195M (19990 (czarny), 37000 (niebieski), 58000 (czerwony), 62900 (brązowy))	Hempel			Thiram	S07	137-26-8	1.94	microg/cm2/day	2		Professional use only
SeaQuantum Ultra S (DARK RED, LIGHT RED)	Jotun paint			Copper pyrithione	S01	14915-37-8	1.96	microg/cm2/day	2		Professional use only
Hempel's Antifouling Olympic 86951				Zinc oxide	S06	1314-13-2	2	microg/cm2/day	3		Professional use only
SeaForce 30 (DARK RED, LIGHT RED)	Jotun paint			Zineb	S05	12122-67-7	2.31	microg/cm2/day	2		Professional use only
Trilux 33				Zinc pyrithione	S03	13463-41-7	2.42	microg/cm2/day	2		Professional use only
Cruiser One				Copper(I)oxide	S00	1317-39-1	2.5	microg/cm2/day	4	Leaching, CEPE	Amateur and professional use
Hempel's Antifouling Olympic 86951				Zinc oxide	S06	1314-13-2	2.9	microg/cm2/day	4	Leaching, CEPE	Professional use only
Hempel's Antifouling Olympic 86951				Copper(I)oxide	S00	1317-39-1	3.6	microg/cm2/day	3		Professional use only
Interspeed 5617				Zinc oxide	S06	1314-13-2	4.7	microg/cm2/day	4	Leaching, CEPE	Professional use only
Anonymous, due to non-disclosure agreement	Anonymous			Copper thiocyanate	S00	1111-67-7	4.71	microg/cm2/day	1		Professional use only
Anonymous, due to non-disclosure agreement	Anonymous			Copper thiocyanate	S00	1111-67-7	5.4	microg/cm2/day	1		Professional use only
Hempel's Antifouling Olympic 86951				Zinc oxide	S06	1314-13-2	5.6	microg/cm2/day	3		Professional use only
Cruiser One				Zinc oxide	S06	1314-13-2	5.8	microg/cm2/day	4	Leaching, CEPE	Amateur and professional use
Trilux 33				Copper thiocyanate	S00	1111-67-7	6.32	microg/cm2/day	2		Professional use only
Mille Xtra	Hempel A/S			Zinc oxide	S06	1314-13-2	6.8	microg/cm2/day	4	Leaching, CEPE	Amateur and professional use
Biltema Antifouling	Boero Bartolomeo			Copper(I)oxide	S00	1317-39-1	7	microg/cm2/day	4	Leaching, CEPE	Amateur and professional use
Hempel's Antifouling Olympic 86951				Copper(I)oxide	S00	1317-39-1	8.9	microg/cm2/day	4	Leaching, CEPE	Professional use only
Sea Force 60 (Spl)	Jotun A/S	Self-polishing		Copper(I)oxide	S00	1317-39-1	9.1	microg/cm2/day	2		Professional use only
SeaForce 30 (DARK RED, LIGHT RED)	Jotun paint			copper oxide or copper thiocyanate?	S00		9.78	microg/cm2/day	2		Professional use only
Sigma Ecofleet 290	PPG Coatings			copper oxide or copper thiocyanate?	S00		12.25	microg/cm2/day	2
Hempel's Antifouling Olympic 86951				Copper(I)oxide	S00	1317-39-1	13	microg/cm2/day	3		Professional use only
Hempel's Antifouling Globic NCT 8190M				Copper(I)oxide	S00	1317-39-1	13.73	microg/cm2/day	2		Professional use only
HEMPEL'S A/F GLOBIC NCT 8195M (19990 (czarny), 37000 (niebieski), 58000 (czerwony), 62900 (brązowy))	Hempel			copper oxide or copper thiocyanate?	S00		13.73	microg/cm2/day	2		Professional use only
Interspeed 5617				Copper(I)oxide	S00	1317-39-1	14.6	microg/cm2/day	4	Leaching, CEPE	Professional use only
Anonymous, due to non-disclosure agreement	Anonymous			Copper compound	S00		15.3	microg/cm2/day	1
Seaguardian				Copper(I)oxide	S00	1317-39-1	18.23	microg/cm2/day	2		Professional use only
Mille Xtra	Hempel A/S			Copper(I)oxide	S00	1317-39-1	18.4	microg/cm2/day	4	Leaching, CEPE	Amateur and professional use
SeaQuantum Classic S	Jotun A/S	Self-polishing		Copper(I)oxide	S00	1317-39-1	18.48	microg/cm2/day	2		Professional use only
Anonymous, due to non-disclosure agreement	Anonymous	Self-polishing		Copper(I)oxide	S00	1317-39-1	20.2	microg/cm2/day	1	ISO 10890:2010 Paints and Varnishes – Modeling of Biocides Release Rate from Antifouling Paints by Mass Balance Calculation	Professional use only
Anonymous, due to non-disclosure agreement	Anonymous	Self-polishing		Copper(I)oxide	S00	1317-39-1	20.4	microg/cm2/day	1	ISO 10890:2010 Paints and Varnishes – Modeling of Biocides Release Rate from Antifouling Paints by Mass Balance Calculation	Professional use only
SeaQuantum Ultra S (DARK RED, LIGHT RED)	Jotun paint			copper oxide or copper thiocyanate?	S00		22.6	microg/cm2/day	2		Professional use only
Anonymous, due to non-disclosure agreement	Anonymous			Copper oxide or copper hydroxide or cuprous thiocyanate?	S00		23.9	microg/cm2/day	1		Professional use only
Hempel's Antifouling Olympic 86951				Copper(I)oxide	S00	1317-39-1	28.26	microg/cm2/day	2		Professional use only
Anonymous, due to non-disclosure agreement	Anonymous			Copper compound	S00		32	microg/cm2/day	1
Anonymous, due to non-disclosure agreement	Anonymous			Copper compound	S00		59.3	microg/cm2/day	1			BP201 CHARCOAL BLACK, BP401 MEDIUM GREEN, BP501 LIGHT BLUE, BP502 DEEP BLUE, BP701 RED
						counts	43
						average	10.4014
						Stdev	11.2791
						95% CI low	7.03017
						95% CI high	13.7726

## Sheet: AF Baltic_Proper
Product_name	Company	Paint_type	Lifetime	Active_substance	Substance_code	CAS	Leaching_rate(value)	Leaching_rate(unit)	Reference	Method	Use	Comment
Sea Force 60 (Spl)	Jotun A/S	Self-polishing		Copper pyrithione	S01	14915-37-8	0.46	microg/cm2/day	2		Professional use only
SeaQuantum Classic S	Jotun A/S	Self-polishing		Copper pyrithione	S01	14915-37-8	0.61	microg/cm2/day	2		Professional use only
HEMPEL’S ANTIFOULING GLOBIC NCT 8190M (w kolorach: 19990 (czarny), 58000 (czerwony), 62900 (brązowy))	Hempel			DCOIT	S04	64359-81-5	0.77	microg/cm2/day	2		Professional use only
HEMPEL'S A/F GLOBIC NCT 8195M (19990 (czarny), 37000 (niebieski), 58000 (czerwony), 62900 (brązowy))	Hempel			Sea Nine	S04	64359-81-5	0.77	microg/cm2/day	2		Professional use only
Mille Light Copper				Copper(I)oxide	S00	1317-39-1	1.5	microg/cm2/day	4	Leaching, CEPE	Amateur and professional use
Sea Force 60 (Spl)	Jotun A/S	Self-polishing		Zineb	S05	12122-67-7	1.52	microg/cm2/day	2		Professional use only
Sigma Ecofleet 290	PPG Coatings			Diuron	S09	330-54-1	1.57	microg/cm2/day	2
HEMPEL’S ANTIFOULING GLOBIC NCT 8190M (w kolorach: 19990 (czarny), 58000 (czerwony), 62900 (brązowy))	Hempel			Thiram	S07	137-26-8	1.94	microg/cm2/day	2		Professional use only
HEMPEL'S A/F GLOBIC NCT 8195M (19990 (czarny), 37000 (niebieski), 58000 (czerwony), 62900 (brązowy))	Hempel			Thiram	S07	137-26-8	1.94	microg/cm2/day	2		Professional use only
SeaQuantum Ultra S (DARK RED, LIGHT RED)	Jotun paint			Copper pyrithione	S01	14915-37-8	1.96	microg/cm2/day	2		Professional use only
Hempel's Antifouling Olympic 86951	Hempel			Zinc oxide	S06	1314-13-2	2	microg/cm2/day	3		Professional use only
Biltema Antifouling BS				Copper(I)oxide	S00	1317-39-1	2.2	microg/cm2/day	4	Leaching, CEPE	Amateur and professional use
SeaForce 30 (DARK RED, LIGHT RED)	Jotun paint			Zineb	S05	12122-67-7	2.31	microg/cm2/day	2		Professional use only
Trilux 33	International Farbenwerke			Zinc pyrithione	S03	13463-41-7	2.42	microg/cm2/day	2
Cruiser One				Copper(I)oxide	S00	1317-39-1	2.5	microg/cm2/day	4	Leaching, CEPE	Amateur and professional use
Hempel's Antifouling Olympic 86951	Hempel			Zinc oxide	S06	1314-13-2	2.9	microg/cm2/day	4	Leaching, CEPE	Professional use only
Hempel's Antifouling Olympic 86951				Copper(I)oxide	S00	1317-39-1	3.6	microg/cm2/day	3		Professional use only
Interspeed 5617				Zinc oxide	S06	1314-13-2	4.7	microg/cm2/day	4	Leaching, CEPE	Professional use only
Anonymous, due to non-disclosure agreement	Anonymous			Copper thiocyanate	S00	1111-67-7	4.71	microg/cm2/day	1
Anonymous, due to non-disclosure agreement	Anonymous			Copper thiocyanate	S00	1111-67-7	5.4	microg/cm2/day	1
Hempel's Antifouling Olympic 86951				Zinc oxide	S06	1314-13-2	5.6	microg/cm2/day	3		Professional use only
Cruiser One				Zinc oxide	S06	1314-13-2	5.8	microg/cm2/day	4	Leaching, CEPE	Amateur and professional use
Trilux 33	International Farbenwerke			Copper thiocyanate	S00	1111-67-7	6.32	microg/cm2/day	2
Mille Xtra	Hempel A/S			Zinc oxide	S06	1314-13-2	6.8	microg/cm2/day	4	Leaching, CEPE	Amateur and professional use
Biltema Antifouling	Boero Bartolomeo			Copper(I)oxide	S00	1317-39-1	7	microg/cm2/day	4	Leaching, CEPE	Amateur and professional use
Hempel's Antifouling Olympic 86951				Copper(I)oxide	S00	1317-39-1	8.9	microg/cm2/day	4	Leaching, CEPE	Professional use only
Sea Force 60 (Spl)	Jotun A/S	Self-polishing		Copper(I)oxide	S00	1317-39-1	9.1	microg/cm2/day	2		Professional use only
SeaForce 30 (DARK RED, LIGHT RED)	Jotun paint			copper oxide or copper thiocyanate?	S00		9.78	microg/cm2/day	2		Professional use only
Sigma Ecofleet 290	PPG Coatings			copper oxide or copper thiocyanate?	S00		12.25	microg/cm2/day	2
Hempel's Antifouling Olympic 86951				Copper(I)oxide	S00	1317-39-1	13	microg/cm2/day	3		Professional use only
HEMPEL’S ANTIFOULING GLOBIC NCT 8190M (w kolorach: 19990 (czarny), 58000 (czerwony), 62900 (brązowy))	Hempel			Copper(I)oxide	S00	1317-39-1	13.73	microg/cm2/day	2		Professional use only
HEMPEL'S A/F GLOBIC NCT 8195M (19990 (czarny), 37000 (niebieski), 58000 (czerwony), 62900 (brązowy))	Hempel			copper oxide or copper thiocyanate?	S00		13.73	microg/cm2/day	2		Professional use only
Interspeed 5617				Copper(I)oxide	S00	1317-39-1	14.6	microg/cm2/day	4	Leaching, CEPE	Professional use only
Anonymous, due to non-disclosure agreement	Anonymous			Copper compound	S00		15.3	microg/cm2/day	1
Seaguardian				Copper(I)oxide	S00	1317-39-1	18.23	microg/cm2/day	2		Professional use only
Mille Xtra	Hempel A/S			Copper(I)oxide	S00	1317-39-1	18.4	microg/cm2/day	4	Leaching, CEPE	Amateur and professional use
SeaQuantum Classic S	Jotun A/S	Self-polishing		Copper(I)oxide	S00	1317-39-1	18.48	microg/cm2/day	2		Professional use only
Anonymous, due to non-disclosure agreement	Anonymous	Self-polishing		Copper(I)oxide	S00	1317-39-1	20.2	microg/cm2/day	1	ISO 10890:2010 Paints and Varnishes – Modeling of Biocides Release Rate from Antifouling Paints by Mass Balance Calculation	Professional use only
Anonymous, due to non-disclosure agreement	Anonymous	Self-polishing		Copper(I)oxide	S00	1317-39-1	20.4	microg/cm2/day	1	ISO 10890:2010 Paints and Varnishes – Modeling of Biocides Release Rate from Antifouling Paints by Mass Balance Calculation	Professional use only
SeaQuantum Ultra S (DARK RED, LIGHT RED)	Jotun paint			copper oxide or copper thiocyanate?	S00		22.6	microg/cm2/day	2		Professional use only
Anonymous, due to non-disclosure agreement	Anonymous			Copper oxide or copper hydroxide or cuprous thiocyanate?	S00		23.9	microg/cm2/day	1		Professional use only
Hempel's Antifouling Olympic 86951				Copper(I)oxide	S00	1317-39-1	28.26	microg/cm2/day	2		Professional use only
Anonymous, due to non-disclosure agreement	Anonymous			Copper compound	S00		32	microg/cm2/day	1
Anonymous, due to non-disclosure agreement	Anonymous			Copper compound	S00		59.3	microg/cm2/day	1			BP201 CHARCOAL BLACK, BP401 MEDIUM GREEN, BP501 LIGHT BLUE, BP502 DEEP BLUE, BP701 RED
						counts	44
						average	10.215
						Stdev	11.2155
						95% CI low	6.90108
						95% CI high	13.5289

## Sheet: AF Gulf_of_Bothnia
Product_name	Company	Paint_type	Lifetime	Active_substance	Substance_code	CAS	Leaching_rate(value)	Leaching_rate(unit)	Reference	Comment	Use
Anonymous, due to non-disclosure agreement	Anonymous			Copper(I)oxide	S00	1317-39-1	20.4	microg/cm2/day	1	ISO 10890:2010 Paints and Varnishes – Modeling of Biocides Release Rate from Antifouling Paints by Mass Balance Calculation	Professional use only		concentration percentage by weight
Anonymous, due to non-disclosure agreement	Anonymous			Copper(I)oxide	S00	1317-39-1	20.2	microg/cm2/day	1	ISO 10890:2010 Paints and Varnishes – Modeling of Biocides Release Rate from Antifouling Paints by Mass Balance Calculation	Professional use only		concentration percentage by weight
Biltema Antifouling	Boero Bartolomeo			Copper(I)oxide	S00	1317-39-1	7	microg/cm2/day	4	Leaching, CEPE	Amateur and professional use		concentration percentage by weight
Mille Xtra	Hempel A/S			Copper(I)oxide	S00	1317-39-1	18.4	microg/cm2/day	4	Leaching, CEPE	Amateur and professional use		concentration percentage by weight
Mille Xtra	Hempel A/S			Zinc oxide	S06	1314-13-2	6.8	microg/cm2/day	4	Leaching, CEPE	Amateur and professional use		concentration percentage by weight
Sea Force 60 (Spl)	Jotun A/S			Copper pyrithione	S01	14915-37-8	0.46	microg/cm2/day	2		Professional use only		concentration percentage by weight
Sea Force 60 (Spl)	Jotun A/S			Copper(I)oxide	S00	1317-39-1	9.1	microg/cm2/day	2		Professional use only		concentration percentage by weight
Sea Force 60 (Spl)	Jotun A/S			Zineb	S05	12122-67-7	1.52	microg/cm2/day	2		Professional use only		concentration percentage by weight
SeaQuantum Classic S	Jotun A/S			Copper pyrithione	S01	14915-37-8	0.61	microg/cm2/day	2		Professional use only		concentration percentage by weight
SeaQuantum Classic S	Jotun A/S			Copper(I)oxide	S00	1317-39-1	18.48	microg/cm2/day	2		Professional use only		concentration percentage by weight
						counts	10
						average	10.297
						Stdev	8.33288
						95% CI low	5.13232
						95% CI high	15.4617

## Sheet: AF references
Reference	Author(s)	Year	Title
1	Department of Pesticide Regulation in California (DPR) (2016)	2016	Release rates determined with method ISO (2010) and obtained from DPR via email
2	New Zeeland Environmental Protection Authority (2012)	2012	New Zealand EPA. 2013. Application for the Reassessment of a Group of Hazardous Substances under Section 63 of the Hazardous Substances and New Organisms Act 1996.
3	E. Ytreberg et al (2010)	2010	Ytreberg, E., J. Karlsson, and B. Eklund. 2010. Comparison of toxicity and release rates of Cu and Zn from anti-fouling paints leached in natural and artificial brackish seawater. Science of the Total Environment 408:2459-2466.
4	this work and release rates calculated using method ISO (2010)	2016	Calculated using method: ISO. 2010. Modelling of Biocide Release Rate from Antifouling Paints by Mass-Balance Calculation. International Standard ISO 10890. 2010.

## Sheet: Ballast water
System ->	References ->	water		Chemcial_name	1,1,1,2-Tetrachloroethane	1,1,1-Trichloroethane	1,1,1-Trichloroethene	1,1,2,2-Tetrachloroethane	1,1,2-Trichloroethane	1,1-Dibromoethane	1,1-Dichloroethane	1,1-Dichloroethene	1,1-Dichloropropane	1,2,3-Trichlorobenzene	1,2,3-Trichloropropane	1,2,4-Tribromobenzene	1,2,4-Trichlorobenzene	1,2-Dibromo-3-chloropropane	1,2-Dibromoethane	1,2-Dibromomethane	1,2-Dichloroethane	1,2-Dichloropropane	1,3,5-Tribromobenzene	1,3,5-Trichlorobenzene	1,3-Dichloropropane	2,2-dichloropropane	2,3,4,5-Tetrachlorophenol	2,3,4,6-Tetrachlorophenol	2,3,4-Trichlorophenol	2,3,5,6-Tetrachlorophenol	2,3,5-Trichlorophenol	2,3,6-Trichlorophenol	2,3-Dichlorophenol	2,3-Dihydroxybenzoic acid	2,5-Dihydroxybenzoic acid	2,4,5-Trichlorophenol	2,4,6-Tribromophenol	2,4,6-Trichlorophenol	2,4-Dibromophenol	2,4-Dichlorophenol	2,5-Dichlorophenol	2,6-Dibromophenol	2,6-Dichlorophenol	2-Chlorophenol	2-Chlorotoluene	3,4-Dichlorophenol	3,4,5-trichlorophenol	3,5-Dichlorophenol	3-Chlorophenol
				CAS		71-55-6		79-34-5	79-00-5	557-91-5	75-34-3	75-35-4	78-99-9	87-61-6	96-18-4	615-54-3	120-82-1	96-12-8	106-93-4		107-06-2	78-87-5	626-39-1		142-28-9	594-20-7	4901-51-3	58-90-2	15950-66-0	935-95-5	933-78-8	933-75-5	576-24-9	303-38-8	490-79-9	95-95-4	118-79-6	88-06-2	615-58-7	120-83-2	583-78-8	608-33-3	87-65-0	95-57-8	95-49-8	95-77-2	609-19-8	591-35-5	108-43-0
					µg/L	µg/L	µg/L	µg/L	µg/L	µg/L	µg/L	µg/L	µg/L	µg/L	µg/L	µg/L	µg/L	µg/L	µg/L	µg/L	µg/L	µg/L	µg/L	µg/L	µg/L	µg/L	µg/L	µg/L	µg/L	µg/L	µg/L	µg/L	µg/L	µg/L	µg/L	µg/L	µg/L	µg/L	µg/L	µg/L	µg/L	µg/L	µg/L	µg/L	µg/L	µg/L	µg/L	µg/L	µg/L
				Chemical_group		Haloethane			Haloethane	Haloethane	Haloethane				Halopropane			Halopropane			Haloethane	Halopropane					Chlorinated phenol	Chlorinated phenol		Chlorinated phenol		Chlorinated phenol	Chlorinated phenol				Halophenol	Chlorinated phenol		Chlorinated phenol	Chlorinated phenol		Chlorinated phenol	Chlorinated phenol		Chlorinated phenol		Chlorinated phenol	Chlorinated phenol
ECS-HYCHLOR System (consisting of filtration and disinfection with Active Substance sodium hypochlorite formed by in situ electrochlorination, followed by neutralization with sodium thiosulfate)	1	sea water			n/a	n/a	n/a	n/a	n/a	n/a	n/a	n/a	n/a	n/a	n/a	n/a	n/a	n/a	n/a	n/a	n/a	n/a	n/a	n/a	n/a	n/a	n/a	n/a	n/a	n/a	n/a	n/a	n/a	n/a	n/a	n/a	n/a	n/a	n/a	n/a	n/a	n/a	n/a	n/a	n/a	n/a	n/a	n/a	n/a
		Brackish water			n/a	n/a	n/a	n/a	n/a	n/a	n/a	n/a	n/a	n/a	n/a	n/a	n/a	n/a	n/a	n/a	n/a	n/a	n/a	n/a	n/a	n/a	n/a	n/a	n/a	n/a	n/a	n/a	n/a	n/a	n/a	n/a	n/a	n/a	n/a	n/a	n/a	n/a	n/a	n/a	n/a	n/a	n/a	n/a	n/a
		Fresh water			n/a	n/a	n/a	n/a	n/a	n/a	n/a	n/a	n/a	n/a	n/a	n/a	n/a	n/a	n/a	n/a	n/a	n/a	n/a	n/a	n/a	n/a	n/a	n/a	n/a	n/a	n/a	n/a	n/a	n/a	n/a	n/a	n/a	n/a	n/a	n/a	n/a	n/a	n/a	n/a	n/a	n/a	n/a	n/a	n/a
NK-Cl BlueBallast System (consisting of disinfection with Active Substance sodium hypochlorite, followed by neutralization with sodium thiosulfate)	2	sea water			n/a	n/a	n/a	n/a	n/a	n/a	n/a	n/a	n/a	n/a	n/a	n/a	n/a	n/a	n/a	n/a	n/a	n/a	n/a	n/a	n/a	n/a	n/a	n/a	n/a	n/a	n/a	n/a	n/a	n/a	n/a	n/a	n/a	n/a	n/a	n/a	n/a	n/a	n/a	n/a	n/a	n/a	n/a	n/a	n/a
		Fresh water			n/a	n/a	n/a	n/a	n/a	n/a	n/a	n/a	n/a	n/a	n/a	n/a	n/a	n/a	n/a	n/a	n/a	n/a	n/a	n/a	n/a	n/a	n/a	n/a	n/a	n/a	n/a	n/a	n/a	n/a	n/a	n/a	n/a	n/a	n/a	n/a	n/a	n/a	n/a	n/a	n/a	n/a	n/a	n/a	n/a
		Brackish water			n/a	n/a	n/a	n/a	n/a	n/a	n/a	n/a	n/a	n/a	n/a	n/a	n/a	n/a	n/a	n/a	n/a	n/a	n/a	n/a	n/a	n/a	n/a	n/a	n/a	n/a	n/a	n/a	n/a	n/a	n/a	n/a	n/a	n/a	n/a	n/a	n/a	n/a	n/a	n/a	n/a	n/a	n/a	n/a	n/a
ATPS-BLUEsys Ballast Water Management System (consisting of disinfection with Active Substance sodium hypochlorite formed by in situ electrolysis, followed by neutralization with sodium thiosulfate)	3	no information about water			n/a	n/a	n/a	n/a	n/a	n/a	0.025	n/a	n/a	0.025	0.025	0.025	0.025	0.025	n/a	n/a	0.025	0.025	0.025	0.025	n/a	n/a	n/a	n/a	n/a	n/a	n/a	n/a	0.025	n/a	n/a	n/a	0.025	0.025	0.025	0.025	0.025	0.025	0.025	0.025	0.025	n/a	n/a	n/a	0.025
Ecomarine-EC Ballast Water Management System (consisting of filtration, disinfection with Active Substance sodium hypochlorite formed by in situ electrolysis, followed by neutralization with sodium thiosulfate)	4	sea water and brackish water			n/a	n/a	n/a	n/a	n/a	n/a	n/a	n/a	n/a	n/a	0.025	n/a	n/a	0.025	n/a	n/a	n/a	0.025	n/a	n/a	n/a	n/a	n/a	n/a	n/a	n/a	n/a	n/a	n/a	n/a	n/a	n/a	0.9	n/a	n/a	n/a	n/a	n/a	n/a	n/a	0.025	n/a	n/a	n/a	n/a
KURITA Ballast Water Management System (consisting of disinfection with Active Substance sodium hypochlorite followed by neutralization with sodium sulfite)	5	Seawater			0.025	0.025	n/a	0.025	0.025	n/a	0.025	0.025	0.025	0.025	0.025	n/a	0.025	0.025	0.025	0.025	0.025	0.025	n/a	n/a	0.025	0.025	n/a	n/a	n/a	n/a	n/a	n/a	n/a	n/a	n/a	n/a	0.25	0.025	0.25	0.25	n/a	0.25	0.25	0.25	0.025	n/a	n/a	n/a	n/a
		Brackish water			0.025	0.025	n/a	0.025	0.025	n/a	0.025	0.025	0.025	0.025	0.025	n/a	0.025	0.025	0.025	0.025	0.025	0.025	n/a	n/a	0.025	0.025	n/a	n/a	n/a	n/a	n/a	n/a	n/a	n/a	n/a	n/a	0.25	0.025	0.25	0.25	n/a	0.25	0.25	0.25	0.025	n/a	n/a	n/a	n/a
		Fresh water			0.025	0.025	n/a	0.025	0.025	n/a	0.025	0.025	0.025	0.025	0.025	n/a	0.025	0.025	0.025	0.025	0.025	0.025	n/a	n/a	0.025	0.025	n/a	n/a	n/a	n/a	n/a	n/a	n/a	n/a	n/a	n/a	0.25	0.025	0.25	0.25	n/a	0.25	0.25	0.25	0.025	n/a	n/a	n/a	n/a
BlueZoneTM Ballast Water Management System (consisting of disinfection with Active Substance ozone formed in situ, followed by neutralization with sodium thiosulfate)	6	Sea water			n/a	n/a	n/a	n/a	n/a	n/a	n/a	n/a	n/a	n/a	0.1825	n/a	n/a	n/a	n/a	n/a	n/a	n/a	n/a	n/a	n/a	n/a	n/a	n/a	n/a	n/a	n/a	n/a	n/a	n/a	n/a	n/a	0.075	n/a	n/a	n/a	n/a	n/a	n/a	n/a	n/a	n/a	n/a	n/a	n/a
		Brackish water			n/a	n/a	n/a	n/a	n/a	n/a	n/a	n/a	n/a	n/a	0.1825	n/a	n/a	n/a	n/a	n/a	n/a	n/a	n/a	n/a	n/a	n/a	n/a	n/a	n/a	n/a	n/a	n/a	n/a	n/a	n/a	n/a	0.075	n/a	n/a	n/a	n/a	n/a	n/a	n/a	n/a	n/a	n/a	n/a	n/a
		freshwater			n/a	n/a	n/a	n/a	n/a	n/a	n/a	n/a	n/a	n/a	0.1825	n/a	n/a	n/a	n/a	n/a	n/a	n/a	n/a	n/a	n/a	n/a	n/a	n/a	n/a	n/a	n/a	n/a	n/a	n/a	n/a	n/a	0.075	n/a	n/a	n/a	n/a	n/a	n/a	n/a	n/a	n/a	n/a	n/a	n/a
MARINOMATE™ Ballast Water Management System (consisting of plankill pipe™ unit, disinfection with Active Substance sodium hypochlorite formed by in situ electrolysis, followed by neutralization with sodium thiosulfate)	7	seawater			n/a	n/a	n/a	n/a	n/a	n/a	n/a	n/a	n/a	n/a	n/a	n/a	n/a	n/a	n/a	n/a	0.045	0.0225	n/a	n/a	n/a	n/a	n/a	n/a	n/a	n/a	n/a	n/a	n/a	n/a	n/a	n/a	n/a	n/a	n/a	n/a	n/a	n/a	n/a	n/a	n/a	n/a	n/a	n/a	n/a
		brackish water			n/a	n/a	n/a	n/a	n/a	n/a	n/a	n/a	n/a	n/a	n/a	n/a	n/a	n/a	n/a	n/a	0.045	1.84	n/a	n/a	n/a	n/a	n/a	n/a	n/a	n/a	n/a	n/a	n/a	n/a	n/a	n/a	n/a	n/a	n/a	n/a	n/a	n/a	n/a	n/a	n/a	n/a	n/a	n/a	n/a
Evonik Ballast Water Treatment System with PERACLEAN® Ocean (consisting of treatment with the Preparation PERACLEAN® Ocean containing Active Substances peracetic acid and hydrogen peroxide, followed by neutralization with catalase and sodium sulphite)	8				n/a	2.5	n/a	n/a	0.025	n/a	0.125	n/a	n/a	n/a	n/a	n/a	n/a	n/a	n/a	n/a	0.125	0.0625	n/a	n/a	n/a	n/a	n/a	n/a	n/a	n/a	n/a	n/a	n/a	n/a	n/a	n/a	n/a	n/a	n/a	n/a	n/a	n/a	n/a	n/a	n/a	n/a	n/a	n/a	n/a
OceanDoctor Ballast Water Management System (consisting of filtration and disinfection with uv irradiation and photo-catalytic oxidation using oh-radical as Active Substance)	9	treated seawater			n/a	0.001	n/a	n/a	n/a	n/a	n/a	n/a	n/a	n/a	0.00075	0.0025	n/a	0.0015	n/a	n/a	n/a	0.00225	n/a	n/a	n/a	n/a	0.001	0.001	0.001	0.001	0.003	0.001	0.0015	n/a	n/a	n/a	0.001	0.001	0.00125	n/a	n/a	0.00125	0.0015	0.00125	0.00125	0.001	n/a	0.00125	0.00125
		treated brackish water			n/a	0.001	n/a	n/a	n/a	n/a	n/a	n/a	n/a	n/a	0.00075	0.00025	n/a	0.0015	n/a	n/a	n/a	0.00225	n/a	n/a	n/a	n/a	0.001	0.001	0.001	0.001	0.003	0.001	0.0015	n/a	n/a	n/a	0.001	0.001	0.00125	n/a	n/a	0.00125	0.0015	0.00125	0.00125	0.001	n/a	0.00125	0.00125
EcoGuardianTM Ballast Water Management System (consisting of disinfection with Active Substance sodium hypochlorite formed by in situ electrolysis, followed by neutralization with sodium thiosulfate)	10	treated sea water			n/a	n/a	n/a	n/a	n/a	n/a	n/a	n/a	n/a	n/a	0.33	n/a	n/a	n/a	n/a	n/a	n/a	n/a	n/a	n/a	n/a	n/a	n/a	n/a	n/a	n/a	n/a	n/a	n/a	n/a	n/a	n/a	0.25	n/a	n/a	n/a	n/a	n/a	n/a	n/a	n/a	n/a	n/a	n/a	n/a
		Treated brackish water			n/a	n/a	n/a	n/a	n/a	n/a	n/a	n/a	n/a	n/a	0.33	n/a	n/a	n/a	n/a	n/a	n/a	n/a	n/a	n/a	n/a	n/a	n/a	n/a	n/a	n/a	n/a	n/a	n/a	n/a	n/a	n/a	0.25	n/a	n/a	n/a	n/a	n/a	n/a	n/a	n/a	n/a	n/a	n/a	n/a
AQUARIUS® EC Ballast Water Management System (consisting of disinfection with Active Substance sodium hypochlorite formed by in situ electrolysis, followed by neutralization with sodium bisulfite)	11	Brackish water neutralized			n/a	n/a	n/a	n/a	n/a	n/a	n/a	n/a	n/a	n/a	n/a	n/a	n/a	n/a	n/a	n/a	n/a	n/a	n/a	n/a	n/a	n/a	n/a	n/a	n/a	n/a	n/a	n/a	n/a	n/a	n/a	n/a	0.45	n/a	n/a	n/a	n/a	n/a	n/a	n/a	n/a	n/a	n/a	n/a	n/a
		seawater neutralized			n/a	n/a	n/a	n/a	n/a	n/a	n/a	n/a	n/a	n/a	n/a	n/a	n/a	n/a	n/a	n/a	n/a	n/a	n/a	n/a	n/a	n/a	n/a	n/a	n/a	n/a	n/a	n/a	n/a	n/a	n/a	n/a	0.05	n/a	n/a	n/a	n/a	n/a	n/a	n/a	n/a	n/a	n/a	n/a	n/a
Smart Ballast Ballast Water Management System (consisting of disinfection with Active Substance sodium hypochlorite formed by in situ electrolysis, followed by neutralization with sodium thiosulfate)	12	seawater and brackish water			n/a	n/a	n/a	n/a	n/a	n/a	n/a	n/a	n/a	9	n/a	n/a	12	n/a	n/a	n/a	n/a	n/a	n/a	n/a	n/a	n/a	n/a	n/a	n/a	n/a	n/a	n/a	n/a	n/a	n/a	n/a	n/a	n/a	n/a	n/a	n/a	n/a	n/a	n/a	n/a	n/a	n/a	n/a	n/a
JFE BallastAce that makes use of NEO-CHLOR MARINETM Ballast Water Management System (consisting of filtration, disinfection with Active Substance sodium hypochlorite, followed by neutralization with sodium sulfite)	13	neutralizated ballast water			n/a	n/a	n/a	n/a	n/a	n/a	n/a	n/a	n/a	n/a	n/a	n/a	n/a	n/a	n/a	n/a	n/a	n/a	n/a	n/a	n/a	n/a	n/a	n/a	n/a	n/a	n/a	n/a	n/a	n/a	n/a	n/a	n/a	n/a	n/a	n/a	n/a	n/a	n/a	n/a	n/a	n/a	n/a	n/a	n/a
DESMI Ocean Guard Ballast Water Management System (consisting of filtration and disinfection with UV irradiation and Active Substance ozone)	14	Brackish water			n/a	0.005	n/a	n/a	n/a	n/a	n/a	n/a	n/a	0.025	0.025	n/a	n/a	0.025	0.005	n/a	n/a	n/a	n/a	n/a	n/a	n/a	n/a	n/a	n/a	n/a	n/a	n/a	n/a	n/a	n/a	n/a	n/a	n/a	0.0125	n/a	n/a	0.0125	n/a	n/a	0.025	n/a	n/a	n/a	n/a
		fresh water			n/a	0.005	n/a	n/a	n/a	n/a	n/a	n/a	n/a	0.025	0.025	n/a	n/a	0.025	0.005	n/a	n/a	n/a	n/a	n/a	n/a	n/a	n/a	n/a	n/a	n/a	n/a	n/a	n/a	n/a	n/a	n/a	n/a	n/a	0.0125	n/a	n/a	0.0125	n/a	n/a	0.025	n/a	n/a	n/a	n/a
Neo-PurimarTM Ballast Water Management System (consisting of filtration and treatment with Active Substance sodium hypochlorite formed by in situ electrolysis, followed by further treatment with sodium hypochlorite and neutralization with sodium thiosulfate)	15	brackish water			n/a	n/a	n/a	n/a	n/a	n/a	n/a	n/a	n/a	n/a	n/a	n/a	n/a	n/a	n/a	n/a	n/a	n/a	n/a	n/a	n/a	n/a	n/a	n/a	n/a	n/a	n/a	n/a	n/a	n/a	n/a	n/a	n/a	n/a	n/a	n/a	n/a	n/a	n/a	n/a	n/a	n/a	n/a	n/a	n/a
		seawater			n/a	n/a	n/a	n/a	n/a	n/a	n/a	n/a	n/a	n/a	n/a	n/a	n/a	n/a	n/a	n/a	n/a	n/a	n/a	n/a	n/a	n/a	n/a	n/a	n/a	n/a	n/a	n/a	n/a	n/a	n/a	n/a	n/a	n/a	n/a	n/a	n/a	n/a	n/a	n/a	n/a	n/a	n/a	n/a	n/a
MICROFADETM Ballast Water Management System (consisting of filtration and disinfection with Active Substance calcium hypochlorite, followed by neutralization with sodium sulphite)	16	Seawater			n/a	0.025	n/a	n/a	n/a	n/a	n/a	n/a	n/a	n/a	0.025	n/a	n/a	0.025	n/a	n/a	n/a	n/a	n/a	n/a	n/a	n/a	n/a	n/a	n/a	n/a	n/a	n/a	n/a	n/a	n/a	n/a	0.25	n/a	0.25	n/a	n/a	0.25	n/a	n/a	0.025	n/a	n/a	n/a	n/a
		Brackish water			n/a	0.025	n/a	n/a	n/a	n/a	n/a	n/a	n/a	n/a	0.025	n/a	n/a	0.025	n/a	n/a	n/a	n/a	n/a	n/a	n/a	n/a	n/a	n/a	n/a	n/a	n/a	n/a	n/a	n/a	n/a	n/a	0.25	n/a	0.25	n/a	n/a	0.25	n/a	n/a	0.025	n/a	n/a	n/a	n/a
ERMA FIRST Ballast Water Management System (consisting of filtration, cyclonic separation and treatment with Active Substance sodium hypochlorite formed by in situ electrolysis, followed by neutralization with sodium bisulfite)	17				n/a	n/a	0.025	n/a	0.025	n/a	0.125	n/a	n/a	n/a	n/a	n/a	n/a	n/a	n/a	n/a	0.125	0.0625	n/a	n/a	n/a	n/a	n/a	n/a	n/a	n/a	n/a	n/a	n/a	n/a	n/a	n/a	n/a	n/a	n/a	n/a	n/a	n/a	n/a	n/a	n/a	n/a	n/a	n/a	n/a
SiCURETM Ballast Water Management System (consisting of filtration and treatment with Active Substance sodium hypochlorite formed by in situ electrolysis, followed by neutralization with sodium sulfite)	18	Fresch water			n/a	n/a	n/a	n/a	n/a	n/a	n/a	n/a	n/a	n/a	n/a	n/a	n/a	n/a	n/a	n/a	n/a	n/a	n/a	n/a	n/a	n/a	n/a	n/a	n/a	n/a	n/a	n/a	n/a	n/a	n/a	n/a	n/a	n/a	n/a	n/a	n/a	n/a	n/a	n/a	n/a	n/a	n/a	n/a	n/a
		Brackish water			n/a	n/a	n/a	n/a	n/a	n/a	n/a	n/a	n/a	n/a	n/a	n/a	n/a	n/a	n/a	n/a	n/a	n/a	n/a	n/a	n/a	n/a	n/a	n/a	n/a	n/a	n/a	n/a	n/a	n/a	n/a	n/a	n/a	n/a	n/a	n/a	n/a	n/a	n/a	n/a	n/a	n/a	n/a	n/a	n/a
		Seawater			n/a	n/a	n/a	n/a	n/a	n/a	n/a	n/a	n/a	n/a	n/a	n/a	n/a	n/a	n/a	n/a	n/a	n/a	n/a	n/a	n/a	n/a	n/a	n/a	n/a	n/a	n/a	n/a	n/a	n/a	n/a	n/a	n/a	n/a	n/a	n/a	n/a	n/a	n/a	n/a	n/a	n/a	n/a	n/a	n/a
PurimarTM Ballast Water Management System (consisting of filtration and treatment with Active Substance sodium hypochlorite formed by in situ electrolysis, followed by neutralization with sodium thiosulfate)	19	treated ballast water			n/a	n/a	n/a	n/a	n/a	n/a	n/a	n/a	n/a	n/a	n/a	n/a	n/a	n/a	n/a	n/a	n/a	n/a	n/a	n/a	n/a	n/a	n/a	n/a	n/a	n/a	n/a	n/a	n/a	n/a	n/a	n/a	n/a	n/a	n/a	n/a	n/a	n/a	n/a	n/a	n/a	n/a	n/a	n/a	n/a
HiBallastTM Ballast Water Management System (consisting of filtration, disinfection with Active Substance sodium hypochlorite formed by in situ electrolysis, followed by neutralization with sodium thiosulphate)	20	water unknown			0.02	0.0175	n/a	0.0275	0.0225	n/a	0.0225	0.005	n/a	0.0125	0.02	0.0225	0.0125	0.015	n/a	n/a	0.26	0.0175	0.0225	n/a	n/a	n/a	0.025	0.025	0.025	0.025	0.025	0.025	0.025	n/a	n/a	0.025	0.025	0.025	0.025	0.025	0.025	0.025	0.05	0.05	0.01	0.025	0.025	0.025	0.05
Severn Trent De Nora BalPure® Ballast Water Management System	21	Fresh water			n/a	n/a	n/a	n/a	n/a	n/a	n/a	n/a	n/a	n/a	n/a	n/a	n/a	n/a	n/a	n/a	n/a	n/a	n/a	n/a	n/a	n/a	n/a	n/a	n/a	n/a	n/a	n/a	n/a	n/a	n/a	n/a	n/a	n/a	n/a	n/a	n/a	n/a	n/a	n/a	n/a	n/a	n/a	n/a	n/a
		brackish water			n/a	n/a	n/a	n/a	n/a	n/a	n/a	n/a	n/a	n/a	n/a	n/a	n/a	n/a	n/a	n/a	n/a	n/a	n/a	n/a	n/a	n/a	n/a	n/a	n/a	n/a	n/a	n/a	n/a	n/a	n/a	n/a	n/a	n/a	n/a	n/a	n/a	n/a	n/a	n/a	n/a	n/a	n/a	n/a	n/a
		seawater			n/a	n/a	n/a	n/a	n/a	n/a	n/a	n/a	n/a	n/a	n/a	n/a	n/a	n/a	n/a	n/a	n/a	n/a	n/a	n/a	n/a	n/a	n/a	n/a	n/a	n/a	n/a	n/a	n/a	n/a	n/a	n/a	n/a	n/a	n/a	n/a	n/a	n/a	n/a	n/a	n/a	n/a	n/a	n/a	n/a
Ecochlor® Ballast Water Management System	22	treated ballast water			n/a	n/a	n/a	n/a	n/a	n/a	n/a	n/a	n/a	n/a	n/a	n/a	n/a	n/a	n/a	n/a	n/a	n/a	n/a	n/a	n/a	n/a	n/a	n/a	n/a	n/a	n/a	n/a	n/a	n/a	n/a	n/a	n/a	n/a	n/a	n/a	n/a	n/a	n/a	n/a	n/a	n/a	n/a	n/a	n/a
OceanGuardTM Ballast Water Management System	23	no info			n/a	n/a	n/a	n/a	n/a	n/a	n/a	n/a	n/a	n/a	0.25	n/a	n/a	0.25	n/a	0.25	n/a	n/a	0.25	n/a	n/a	n/a	n/a	n/a	n/a	n/a	n/a	n/a	n/a	n/a	n/a	n/a	0.1	n/a	0.025	n/a	n/a	0.025	n/a	n/a	0.125	n/a	n/a	n/a	n/a
BalClor Ballast Water Management System	24	treated ballast water			n/a	n/a	n/a	n/a	n/a	n/a	n/a	n/a	n/a	n/a	n/a	n/a	n/a	n/a	n/a	n/a	n/a	n/a	n/a	n/a	n/a	n/a	n/a	n/a	n/a	n/a	n/a	n/a	n/a	n/a	n/a	n/a	n/a	n/a	n/a	n/a	n/a	n/a	n/a	n/a	n/a	n/a	n/a	n/a	n/a
JFE Ballast Water Management System (JFE-BWMS) that makes use of TG Ballastcleaner and TG Environmentalguard	25	Brackish water			n/a	n/a	n/a	n/a	n/a	n/a	n/a	n/a	n/a	n/a	n/a	n/a	n/a	n/a	n/a	n/a	n/a	n/a	n/a	n/a	n/a	n/a	n/a	n/a	n/a	n/a	n/a	n/a	n/a	n/a	n/a	n/a	n/a	n/a	n/a	n/a	n/a	n/a	n/a	n/a	n/a	n/a	n/a	n/a	n/a
		Seawater			n/a	n/a	n/a	n/a	n/a	n/a	n/a	n/a	n/a	n/a	n/a	n/a	n/a	n/a	n/a	n/a	n/a	n/a	n/a	n/a	n/a	n/a	n/a	n/a	n/a	n/a	n/a	n/a	n/a	n/a	n/a	n/a	n/a	n/a	n/a	n/a	n/a	n/a	n/a	n/a	n/a	n/a	n/a	n/a	n/a
Resource Ballast Technologies System	26	no info			n/a	n/a	n/a	n/a	n/a	n/a	n/a	n/a	n/a	n/a	n/a	n/a	n/a	n/a	n/a	n/a	n/a	n/a	n/a	n/a	n/a	n/a	n/a	n/a	n/a	n/a	n/a	n/a	n/a	n/a	n/a	n/a	n/a	n/a	n/a	n/a	n/a	n/a	n/a	n/a	n/a	n/a	n/a	n/a	n/a
NK-O3 BlueBallast System (Ozone)	27	no information about water, this is the maxiumums that are grey in annex 6 page 6			n/a	n/a	n/a	n/a	n/a	n/a	n/a	n/a	n/a	n/a	n/a	n/a	n/a	n/a	n/a	n/a	n/a	n/a	n/a	n/a	n/a	n/a	n/a	n/a	n/a	n/a	n/a	n/a	n/a	n/a	n/a	n/a	n/a	n/a	n/a	n/a	n/a	n/a	n/a	n/a	n/a	n/a	n/a	n/a	n/a
RWO Ballast Water Management System (CleanBallast)	28	Fresh water			n/a	n/a	n/a	n/a	n/a	n/a	n/a	n/a	n/a	n/a	n/a	n/a	n/a	n/a	n/a	n/a	n/a	n/a	n/a	n/a	n/a	n/a	n/a	n/a	n/a	n/a	n/a	n/a	n/a	n/a	n/a	n/a	n/a	n/a	n/a	n/a	n/a	n/a	n/a	n/a	n/a	n/a	n/a	n/a	n/a
		Brackish water			n/a	n/a	n/a	n/a	n/a	n/a	n/a	n/a	n/a	n/a	n/a	n/a	n/a	n/a	n/a	n/a	n/a	n/a	n/a	n/a	n/a	n/a	n/a	n/a	n/a	n/a	n/a	n/a	n/a	n/a	n/a	n/a	n/a	n/a	n/a	n/a	n/a	n/a	n/a	n/a	n/a	n/a	n/a	n/a	n/a
		Sea water			n/a	n/a	n/a	n/a	n/a	n/a	n/a	n/a	n/a	n/a	n/a	n/a	n/a	n/a	n/a	n/a	n/a	n/a	n/a	n/a	n/a	n/a	n/a	n/a	n/a	n/a	n/a	n/a	n/a	n/a	n/a	n/a	n/a	n/a	n/a	n/a	n/a	n/a	n/a	n/a	n/a	n/a	n/a	n/a	n/a
OceanSaver® Ballast Water Management System	29	Treated ballastwater			n/a	n/a	n/a	n/a	n/a	n/a	n/a	n/a	n/a	n/a	2.3	0.125	n/a	0.25	n/a	n/a	n/a	n/a	0.125	n/a	n/a	n/a	0.025	0.025	0.025	0.025	0.025	0.025	0.025	n/a	n/a	0.025	n/a	0.025	n/a	0.025	0.025	n/a	0.025	0.025	0.125	0.025	0.025	0.025	0.025
Electro-Clean System (ECS)	30	Treated water after neutralization			n/a	n/a	n/a	n/a	n/a	n/a	n/a	n/a	n/a	n/a	0.0015	0.00275	n/a	0.00225	n/a	n/a	n/a	n/a	0.00275	n/a	n/a	n/a	n/a	n/a	n/a	n/a	n/a	n/a	n/a	2.5	5	n/a	0.38	0.001	0.02	0.0005	n/a	0.01	n/a	0.00075	0.0015	n/a	n/a	n/a	n/a
SEDNA® using PERACLEAN® OCEAN	31				n/a	n/a	n/a	n/a	n/a	n/a	n/a	n/a	n/a	n/a	n/a	n/a	n/a	n/a	n/a	n/a	n/a	n/a	n/a	n/a	n/a	n/a	0.025	0.05	0.075	0.1	0.125	0.15	0.175	n/a	n/a	0.025	n/a	0.025	n/a	0.025	0.025	n/a	0.025	0.025	n/a	0.025	0.05	0.075	0.1
PureBallast Management System	32	sea water			n/a	n/a	n/a	n/a	n/a	n/a	n/a	n/a	n/a	n/a	n/a	n/a	n/a	n/a	n/a	n/a	n/a	n/a	n/a	n/a	n/a	n/a	n/a	n/a	n/a	n/a	n/a	n/a	n/a	n/a	n/a	n/a	n/a	n/a	n/a	n/a	n/a	n/a	n/a	n/a	n/a	n/a	n/a	n/a	n/a
Ballast Water Management System with PERACLEAN® Ocean (SKY-SYSTEM®) (consisting of treatment with Preparation PERACLEAN® Ocean containing Active Substances peracetic acid and hydrogen peroxide, followed by neutralization with sodium sulphite)	33	treated ballast water			n/a	n/a	n/a	n/a	n/a	n/a	n/a	n/a	n/a	n/a	n/a	n/a	n/a	0.025	n/a	n/a	n/a	n/a	n/a	n/a	n/a	n/a	0.0025	0.005	0.0075	0.01	0.0125	0.015	0.0175	n/a	n/a	0.0025	0.2	0.0025	0.025	0.0025	0.0025	0.025	0.0025	0.0025	n/a	0.0025	0.0025	0.0025	0.0025
Special Pipe Hybrid Ballast Water Management System combined with Ozone treatment version (SP-Hybrid BWMS Ozone version)	34				n/a	n/a	n/a	n/a	n/a	n/a	n/a	n/a	n/a	n/a	n/a	n/a	n/a	n/a	n/a	n/a	n/a	n/a	n/a	n/a	n/a	n/a	n/a	n/a	n/a	n/a	n/a	n/a	n/a	n/a	n/a	n/a	n/a	n/a	n/a	n/a	n/a	n/a	n/a	n/a	n/a	n/a	n/a	n/a	n/a
Greenship Sedinox Ballast Water Management System	35	treated brackish water			n/a	0.025	n/a	n/a	0.025	n/a	0.125	n/a	n/a	n/a	n/a	n/a	n/a	n/a	n/a	n/a	0.125	n/a	n/a	n/a	n/a	n/a	n/a	n/a	n/a	n/a	n/a	n/a	n/a	n/a	n/a	n/a	n/a	n/a	n/a	n/a	n/a	n/a	n/a	n/a	n/a	n/a	n/a	n/a	n/a
		treated fresh water			n/a	0.025	n/a	n/a	0.025	n/a	0.125	n/a	n/a	n/a	n/a	n/a	n/a	n/a	n/a	n/a	0.125	n/a	n/a	n/a	n/a	n/a	n/a	n/a	n/a	n/a	n/a	n/a	n/a	n/a	n/a	n/a	n/a	n/a	n/a	n/a	n/a	n/a	n/a	n/a	n/a	n/a	n/a	n/a	n/a
GloEn-PatrolTM Ballast Water Management System	36	seawater			n/a	n/a	n/a	n/a	n/a	n/a	n/a	n/a	n/a	n/a	n/a	n/a	n/a	n/a	n/a	n/a	n/a	n/a	n/a	n/a	n/a	n/a	n/a	n/a	n/a	n/a	n/a	n/a	n/a	n/a	n/a	n/a	n/a	n/a	n/a	n/a	n/a	n/a	n/a	n/a	n/a	n/a	n/a	n/a	n/a
		Brackishwater			n/a	n/a	n/a	n/a	n/a	n/a	n/a	n/a	n/a	n/a	n/a	n/a	n/a	n/a	n/a	n/a	n/a	n/a	n/a	n/a	n/a	n/a	n/a	n/a	n/a	n/a	n/a	n/a	n/a	n/a	n/a	n/a	n/a	n/a	n/a	n/a	n/a	n/a	n/a	n/a	n/a	n/a	n/a	n/a	n/a
AquaStar™ Ballast Water Management System (consisting of cavitation (Smart Pipe), disinfection with Active Substance sodium hypochlorite formed by in situ electrolysis, followed by neutralization with sodium thiosulphate)	37				n/a	n/a	n/a	n/a	n/a	n/a	n/a	n/a	n/a	n/a	n/a	n/a	n/a	n/a	n/a	n/a	0.11	n/a	n/a	n/a	n/a	n/a	n/a	n/a	n/a	n/a	n/a	n/a	n/a	n/a	n/a	n/a	n/a	n/a	n/a	n/a	n/a	n/a	n/a	n/a	n/a	n/a	n/a	n/a	n/a
ARA Ballast Ballast Water Management System	38				0.0025	0.0025	n/a	0.0025	0.0025	n/a	0.01	0.02	n/a	0.0025	0.0025	0.005	0.0025	0.0025	n/a	n/a	n/a	0.005	0.005	n/a	n/a	n/a	0.075	0.05	0.1	0.075	0.15	0.05	0.05	n/a	n/a	0.15	0.2	0.075	0.075	0.125	0.075	0.15	0.1	0.1	0.0025	0.05	0.1	0.1	0.05
Hyundai Heavy Industries Co., Ltd. (HHI) Ballast Water Managemant System (EcoBallast)	39	brackish water			n/a	n/a	n/a	n/a	n/a	n/a	n/a	n/a	n/a	n/a	0.00025	0.00025	n/a	0.00025	n/a	n/a	n/a	n/a	0.00025	n/a	n/a	n/a	0.0075	0.0075	0.0075	0.0075	0.005	0.0075	0.005	n/a	n/a	0.005	n/a	0.0075	n/a	0.005	0.0075	0.0075	n/a	0.0075	0.0025	0.0075	0.0075	0.005	0.0075
Hitachi Ballast Water Purification System (ClearBallast)	40	unknown water			n/a	0.025	n/a	n/a	0.025	n/a	n/a	0.025	n/a	n/a	n/a	n/a	n/a	n/a	n/a	n/a	0.025	0.025	n/a	n/a	n/a	n/a	n/a	n/a	n/a	n/a	n/a	n/a	n/a	n/a	n/a	n/a	n/a	n/a	n/a	n/a	n/a	n/a	n/a	n/a	n/a	n/a	n/a	n/a	n/a
				Average	0.0195	0.182133	0.025	0.021	0.0225	#DIV/0!	0.06325	0.0208333	0.025	1.01833	0.182193	0.0229063	1.73071	0.0429444	0.017	0.08125	0.0834615	0.154607	0.0615	0.025	0.025	0.025	0.02025	0.0205625	0.03025	0.0305625	0.0435625	0.0343125	0.0361667	2.5	5	0.03875	0.205095	0.0202308	0.0981667	0.0893636	0.0264286	0.0965625	0.0891364	0.0760192	0.0290588	0.017125	0.035	0.029375	0.0291667
				Stdev	0.00974679	0.641303	#DIV/0!	0.0103983	0.00707107	#DIV/0!	0.053334	0.00801041	4.24919e-18	2.99314	0.485307	0.0424224	4.52834	0.0760398	0.0109545	0.1125	0.0700114	0.485431	0.09382	#DIV/0!	4.24919e-18	4.24919e-18	0.0247386	0.0205312	0.0371657	0.036957	0.0590311	0.0494462	0.0542719	#DIV/0!	#DIV/0!	0.0554921	0.202692	0.0198847	0.112374	0.108541	0.0234457	0.112185	0.106999	0.1028	0.0376147	0.0172932	0.0359514	0.0378083	0.0329002
				95% CI lower	0.0109567	-0.142405	#DIV/0!	0.0118856	0.0181174	#DIV/0!	0.0301939	0.0144238	0.025	-0.937146	-0.0205999	-0.00649043	-1.62386	0.0078165	0.00739818	-0.028998	0.0454036	-0.0996725	-0.00800153	#DIV/0!	0.025	0.025	0.00310732	0.00633535	0.00449599	0.0049531	0.00265677	4.86793e-05	0.000709687	#DIV/0!	#DIV/0!	-0.00565213	0.118404	0.00942153	0.0412987	0.025221	0.00906005	0.0415928	0.0259052	0.0201373	0.0111783	0.00514167	0.00623345	0.0031757	0.00767228
				95% CI upper	0.0280433	0.506672	#DIV/0!	0.0301144	0.0268826	#DIV/0!	0.0963061	0.0272429	0.025	2.97381	0.384986	0.0523029	5.08529	0.0780724	0.0266018	0.191498	0.121519	0.408887	0.131002	#DIV/0!	0.025	0.025	0.0373927	0.0347897	0.056004	0.0561719	0.0844682	0.0685763	0.0716236	#DIV/0!	#DIV/0!	0.0831521	0.291786	0.03104	0.155035	0.153506	0.0437971	0.151532	0.152367	0.131901	0.0469394	0.0291083	0.0637665	0.0555743	0.0506611
				analyzed sampels	5	15	1	5	10	0	10	6	3	9	22	8	7	18	5	4	13	14	7	1	3	3	8	8	8	8	8	8	9	1	1	6	21	13	15	11	7	16	11	13	17	8	6	8	9
[truncated: 84 more columns]

## Sheet: Ballast water references
Ref. nr.	Reference	System
1	MEPC 69/4/5, annex 4	ECS-HYCHLOR System (consisting of filtration and disinfection with Active Substance sodium hypochlorite formed by in situ electrochlorination, followed by neutralization with sodium thiosulfate)
2	MEPC 69/4/5, annex 5	NK-Cl BlueBallast System (consisting of disinfection with Active Substance sodium hypochlorite, followed by neutralization with sodium thiosulfate)
3	MEPC 69/4/5, annex 6 and MEPC 66/2/2	ATPS-BLUEsys Ballast Water Management System (consisting of disinfection with Active Substance sodium hypochlorite formed by in situ electrolysis, followed by neutralization with sodium thiosulfate)
4	MEPC 68/2/21 annex 5, MEPC 66/2/7 annex 7 and MEPC 66/2/3	Ecomarine-EC Ballast Water Management System (consisting of filtration, disinfection with Active Substance sodium hypochlorite formed by in situ electrolysis, followed by neutralization with sodium thiosulfate)
5	MEPC 67/2/4, annex 6	KURITA Ballast Water Management System (consisting of disinfection with Active Substance sodium hypochlorite followed by neutralization with sodium sulfite)
6	MEPC 67/2/4, annex 5	BlueZoneTM Ballast Water Management System (consisting of disinfection with Active Substance ozone formed in situ, followed by neutralization with sodium thiosulfate)
7	MEPC 67/2/4, annex 4	MARINOMATE™ Ballast Water Management System (consisting of plankill pipe™ unit, disinfection with Active Substance sodium hypochlorite formed by in situ electrolysis, followed by neutralization with sodium thiosulfate)
8	MEPC 66/2/10, annex 5	Evonik Ballast Water Treatment System with PERACLEAN® Ocean (consisting of treatment with the Preparation PERACLEAN® Ocean containing Active Substances peracetic acid and hydrogen peroxide, followed by neutralization with catalase and sodium sulphite)
9	MEPC 65/2/19, annex 7	OceanDoctor Ballast Water Management System (consisting of filtration and disinfection with uv irradiation and photo-catalytic oxidation using oh-radical as Active Substance)
10	MEPC 65/2/19, annex 5	EcoGuardianTM Ballast Water Management System (consisting of disinfection with Active Substance sodium hypochlorite formed by in situ electrolysis, followed by neutralization with sodium thiosulfate)
11	MEPC 65/2/9, annex 5	AQUARIUS® EC Ballast Water Management System (consisting of disinfection with Active Substance sodium hypochlorite formed by in situ electrolysis, followed by neutralization with sodium bisulfite)
12	MEPC 64/2/7, annex 6	Smart Ballast Ballast Water Management System (consisting of disinfection with Active Substance sodium hypochlorite formed by in situ electrolysis, followed by neutralization with sodium thiosulfate)
13	MEPC 64/2/7, annex 5	JFE BallastAce that makes use of NEO-CHLOR MARINETM Ballast Water Management System (consisting of filtration, disinfection with Active Substance sodium hypochlorite, followed by neutralization with sodium sulfite)
14	MEPC 64/2/6, annex 4	DESMI Ocean Guard Ballast Water Management System (consisting of filtration and disinfection with UV irradiation and Active Substance ozone)
15	MEPC 63/2/21, annex 6	Neo-PurimarTM Ballast Water Management System (consisting of filtration and treatment with Active Substance sodium hypochlorite formed by in situ electrolysis, followed by further treatment with sodium hypochlorite and neutralization with sodium thiosulfate)
16	MEPC 63/2/11, annex 6	MICROFADETM Ballast Water Management System (consisting of filtration and disinfection with Active Substance calcium hypochlorite, followed by neutralization with sodium sulphite)
17	MEPC 63/2/11, annex 5	ERMA FIRST Ballast Water Management System (consisting of filtration, cyclonic separation and treatment with Active Substance sodium hypochlorite formed by in situ electrolysis, followed by neutralization with sodium bisulfite)
18	MEPC 63/2/10, annex 6	SiCURETM Ballast Water Management System (consisting of filtration and treatment with Active Substance sodium hypochlorite formed by in situ electrolysis, followed by neutralization with sodium sulfite)
19	MEPC 62/2/18, annex 6	PurimarTM Ballast Water Management System (consisting of filtration and treatment with Active Substance sodium hypochlorite formed by in situ electrolysis, followed by neutralization with sodium thiosulfate)
20	MEPC 62/2/18, annex 5	HiBallastTM Ballast Water Management System (consisting of filtration, disinfection with Active Substance sodium hypochlorite formed by in situ electrolysis, followed by neutralization with sodium thiosulphate)
21	MEPC 60/2/16, annex 7	Severn Trent De Nora BalPure® Ballast Water Management System
22	MEPC 61/2/21, annex 6 and MEPC 58/2/2	Ecochlor® Ballast Water Management System
23	MEPC 61/2/21, annex 5 and MEPC 60/2/8	OceanGuardTM Ballast Water Management System
24	MEPC 61/2/15, annex 9	BalClor Ballast Water Management System
25	MEPC 60/2/12, annex 5	JFE Ballast Water Management System (JFE-BWMS) that makes use of TG Ballastcleaner and TG Environmentalguard
26	MEPC 60/2/11, annex 7	Resource Ballast Technologies System
27	MEPC 59/2/16, annex 6	NK-O3 BlueBallast System (Ozone)
28	MEPC 59/2/16, annex 5	RWO Ballast Water Management System (CleanBallast)
29	MEPC 58/2/8, annex 4	OceanSaver® Ballast Water Management System
30	MEPC 58/2/7, annex 7	Electro-Clean System (ECS)
31	MEPC 57/2/10, annex 7	SEDNA® using PERACLEAN® OCEAN
32	MEPC 55/2/5	PureBallast Management System
33	MEPC 66/2/7, annex 4 and MEPC 62/2/12, annex 4	Ballast Water Management System with PERACLEAN® Ocean (SKY-SYSTEM®) (consisting of treatment with Preparation PERACLEAN® Ocean containing Active Substances peracetic acid and hydrogen peroxide, followed by neutralization with sodium sulphite)
34	MEPC 61/2/15, annex 6	Special Pipe Hybrid Ballast Water Management System combined with Ozone treatment version (SP-Hybrid BWMS Ozone version)
35	MEPC 59/2/19, annex 5	Greenship Sedinox Ballast Water Management System
36	MEPC 60/2/11, annex 4	GloEn-PatrolTM Ballast Water Management System
37	MEPC 62/2/18, annex 4 and MEPC 61/2/15, annex 5	AquaStar™ Ballast Water Management System (consisting of cavitation (Smart Pipe), disinfection with Active Substance sodium hypochlorite formed by in situ electrolysis, followed by neutralization with sodium thiosulphate)
38	MEPC 61/2/15, annex 8	ARA Ballast Ballast Water Management System
39	MEPC 59/2/16, annex 8	Hyundai Heavy Industries Co., Ltd. (HHI) Ballast Water Managemant System (EcoBallast)
40	MEPC 57/2, annex 5	Hitachi Ballast Water Purification System (ClearBallast)

## Sheet: Bilge water
Reference	Vessel type	vessel	LOD or LOQ available?	Analyte	oil index	fraction >C10-C12	fraction >C12-C16	fraction >C16-C35	fraction >C35-<C40	naphthalene	acenaphthylene	acenaphthene	fluorene	phenanthrene	anthracene	fluoranthene	pyrene	benz(a)anthracene	chrysene	benz(b)fluoranthene	benz(k)fluoranthene	benz(a)pyrene	dibenzo(ah)anthracene	benzo(ghi)perylene	indeno(123cd)pyrene	PAH, sum 16	PAH, sum carcinogenic	PAH, sum other	PAH, sum L	PAH, sum M	PAH, sum H	anionic surfactants	katjoniska tensider	nonjoniska tensider	benzene	toluene	ethylbenzene	m,p-xylene	o-xylene	xylenes, sum	Aluminum	Antimony	Arsenic	Cadmium	Chromium	Cobalt	Copper	Iron	Lead
				CAS						91-20-3	208-96-8	83-32-9	86-73-7	85-01-8	120-12-7	206-44-0	129-00-0	56-55-3	218-01-9	205-99-2	207-08-9	50-32-8	53-70-3	191-24-2	193-39-5										71-43-2	108-88-3	100-41-4	108-38-3	95-47-6		7429-90-5	7440-36-0	7440-38-2	7440-43-9	7440-47-3	7440-48-4	7440-50-8	7439-89-6	7439-92-1
				Category	Petroleum	Petroleum	Petroleum	Petroleum	Petroleum	PAH	PAH	PAH	PAH	PAH	PAH	PAH	PAH	PAH	PAH	PAH	PAH	PAH	PAH	PAH	PAH	PAH	PAH	PAH	PAH	PAH	PAH	Detergent	Detergent	Detergent	organic compounds	organic compounds	organic compounds	organic compounds	organic compounds	organic compounds	Metal	Metal	Metal	Metal	Metal	Metal	Metal	Metal	Metal
																																									Total	Total	Total	Total	Total	Total	Total	Total	Total
					µg/L	µg/L	µg/L	µg/L	µg/L	µg/L	µg/L	µg/L	µg/L	µg/L	µg/L	µg/L	µg/L	µg/L	µg/L	µg/L	µg/L	µg/L	µg/L	µg/L	µg/L	µg/L	µg/L	µg/L	µg/L	µg/L	µg/L	µg/L	µg/L	µg/L	µg/L	µg/L	µg/L	µg/L	µg/L	µg/L	µg/L	µg/L	µg/L	µg/L	µg/L	µg/L	µg/L	µg/L	µg/L
Source 1	RoPax	Ship A1	LOD		1520	374	637	456	50	118	0.739	4.2	6.47	9.42	0.345	0.196	1.28	0.086	0.108	0.005	0.005	0.005	0.005	0.005	0.005	140	0.19	140	120	18	0.19	8200	n/a	n/a	n/a	n/a	n/a	n/a	n/a	n/a	n/a	n/a	0.5	0.1	120	5.2	3.5	0.62	2
Source 1	RoPax	Ship A1	LOD		1240	367	569	269	31	126	0.775	3.73	5.93	8.92	0.655	0.222	1.42	0.108	0.151	0.026	0.005	0.026	0.005	0.02	0.005	150	0.31	150	130	17	0.33	16200	n/a	n/a	n/a	n/a	n/a	n/a	n/a	n/a	n/a	n/a	0.5	0.1	2	4.7	3.5	0.47	2
Source 1	RoPax	Ship A2	LOD		580	186	290	95	5	82.3	0.571	3.99	7.05	7.13	0.277	0.091	0.492	0.005	0.01	0.005	0.005	0.005	0.005	0.005	0.005	100	0.01	100	87	15	0.01	4540	n/a	n/a	11.5	76.3	21.5	99.3	54	150	n/a	n/a	2	0.1	32	5.5	3.5	0.72	2
Source 1	RoPax	Ship A2	LOD		727	227	437	61	5	102	0.752	4.78	8.86	9.26	0.475	0.125	0.665	0.016	0.014	0.005	0.005	0.005	0.005	0.005	0.005	130	0.03	130	110	19	0.03	4790	n/a	n/a	8.69	61.3	17.1	98.9	45	140	n/a	n/a	0.5	0.1	2	0.11	3.5	0.05	2
Source 1	RoPax	Ship B1	LOD		146	2.5	6.8	116	19	0.015	0.005	0.005	0.005	0.01	0.005	0.005	0.067	0.005	0.005	0.005	0.005	0.005	0.005	0.005	0.005	0.067	0.0175	0.067	0.0125	0.067	0.02	710	n/a	n/a	n/a	n/a	n/a	n/a	n/a	n/a	n/a	n/a	0.5	0.1	230	10	87	0.75	2
Source 1	RoPax	Ship B1	LOD		154	8.8	10.5	117	17	0.015	0.005	0.005	0.005	0.01	0.005	0.005	0.144	0.005	0.005	0.005	0.005	0.005	0.005	0.005	0.005	0.14	0.0175	0.14	0.0125	0.14	0.02	780	n/a	n/a	n/a	n/a	n/a	n/a	n/a	n/a	n/a	n/a	0.5	0.1	2	8.8	80	0.47	2
Source 1	RoPax	Ship B2	LOD		696	17.2	61.6	506	111	0.197	0.005	0.156	0.005	0.01	0.005	0.033	0.129	0.005	0.012	0.005	0.005	0.005	0.005	0.005	0.005	0.53	0.012	0.52	0.35	0.16	0.012	450	n/a	n/a	0.1	0.1	0.58	0.68	2.09	2.8	n/a	n/a	0.5	0.1	6.3	2.8	40	1.8	2
Source 1	RoPax	Ship B2	LOD		492	12.6	37.9	359	82	0.015	0.005	0.005	0.005	0.01	0.005	0.005	0.119	0.005	0.005	0.005	0.005	0.005	0.005	0.005	0.005	0.12	0.0175	0.12	0.0125	0.12	0.02	590	n/a	n/a	0.1	0.1	0.1	0.1	0.1	0.1	n/a	n/a	0.5	0.1	2	3.1	39	0.77	2
Source 1	RoPax	Ship B3	LOD		2560	15.7	38.8	2090	411	0.55	0.1	0.45	0.15	0.1	0.1	0.38	2.9	0.15	0.1	0.1	0.1	0.1	0.1	0.75	0.1	5	0.375	5	1	3.3	0.75	1790	125	250	0.1	0.1	0.1	0.1	0.1	0.1	n/a	n/a	3.9	0.1	18	5.6	122	4.2	2
Source 1	RoPax	Ship C1	LOD		9470	350	649	5920	2550	13	0.131	0.32	1.35	1.85	0.1	0.1	0.259	0.017	0.024	0.014	0.005	0.012	0.005	0.005	0.005	17	0.067	17	13	3.7	0.067	3620	1420	5480	1.73	7.5	6.95	14	1500	2760	n/a	n/a	1.3	0.1	13	0.85	11	8.1	2
Source 1	RoPax	Ship C2	LOD		1620	66.3	141	1070	343	1.4	0.005	0.032	0.059	0.015	0.04	0.034	0.15	0.017	0.05	0.005	0.005	0.037	0.03	0.026	0.014	1.9	0.15	1.8	1.4	0.3	0.17	2280	310	510	0.93	1.29	0.67	3.46	4.96	8.4	n/a	n/a	2.8	0.1	2	0.5	3.5	1.3	2
Source 1	Passenger ferry	Ship D1	LOD		91	50.6	19.4	15	5	8.03	0.005	0.092	0.107	0.027	0.005	0.005	0.005	0.005	0.005	0.005	0.005	0.005	0.005	0.005	0.005	8.3	0.0175	8.3	8.1	0.13	0.02	9440	2440	10700	2.56	9.96	7.17	17	159	494	n/a	n/a	n/a	n/a	20	0.63	8.4	n/a	n/a
Source 1	Passenger ferry	Ship D3	LOD		7490	47	226	5760	1460	0.45	0.025	0.1	0.17	0.33	0.071	0.025	0.24	0.025	0.025	0.025	0.025	0.035	0.025	0.025	0.025	1.3	0.095	1.3	0.45	0.81	0.105	7730	280	100	0.62	1.87	0.3	0.8	0.74	1.5	n/a	n/a	0.5	0.1	2	0.5	3.5	0.51	2
Source 1	Crusie ship	Ship E	LOD		69300	783	4250	53300	10900	120	1	2	18	17	1	7.9	11	1	2.1	1.1	0.28	1.3	0.1	1.1	0.55	180	5.3	180	120	54	6.4	2330	1220	200	0.68	8.36	3.94	35.2	13.4	49	n/a	n/a	3.2	0.1	2	280	33	8.1	2
Source 1	Crusie ship	Ship F	LOD		5030	153	453	3880	548	230	0.2	1.25	3.6	1.5	0.15	0.33	0.37	0.092	0.098	0.12	0.025	0.082	0.025	0.097	0.088	240	0.48	240	230	5.8	0.58	14000	440	100	0.1	2.54	2.38	22.3	8.54	31	n/a	n/a	2	0.1	2	247	14	3.6	2
Source 1	RoRo	Ship G	LOD		463	56.6	132	250	24	7.42	0.282	1.6	1.54	3.19	0.293	0.078	0.395	0.02	0.031	0.005	0.005	0.005	0.005	0.005	0.005	15	0.051	15	9.3	5.5	0.051	n/a	n/a	n/a	n/a	n/a	n/a	n/a	n/a	n/a	n/a	n/a	n/a	n/a	n/a	n/a	n/a	n/a	n/a
Source 5	Container ship	Container ship 1	LOD		275	n/a	n/a	n/a	n/a	n/a	n/a	n/a	n/a	n/a	n/a	n/a	n/a	n/a	n/a	n/a	n/a	n/a	n/a	n/a	n/a	n/a	n/a	n/a	n/a	n/a	n/a	500	n/a	n/a	n/a	n/a	n/a	n/a	n/a	n/a	55.2	33.6	341	0.5	2.6	13.4	19.9	175	0.5
Source 5	Container ship	Container ship 1	LOD		275	n/a	n/a	n/a	n/a	n/a	n/a	n/a	n/a	n/a	n/a	n/a	n/a	n/a	n/a	n/a	n/a	n/a	n/a	n/a	n/a	n/a	n/a	n/a	n/a	n/a	n/a	2500	n/a	n/a	n/a	n/a	n/a	n/a	n/a	n/a	54.3	31.3	388	0.5	1	13.6	25.4	162	0.5
Source 5	Container ship	Container ship 1	LOD		275	n/a	n/a	n/a	n/a	n/a	n/a	n/a	n/a	n/a	n/a	n/a	n/a	n/a	n/a	n/a	n/a	n/a	n/a	n/a	n/a	n/a	n/a	n/a	n/a	n/a	n/a	500	n/a	n/a	n/a	n/a	n/a	n/a	n/a	n/a	73.4	7.3	131	0.5	2.3	12.3	14.9	1.3	0.5
Source 5	Container ship	Container ship 1	LOD		275	n/a	n/a	n/a	n/a	n/a	n/a	n/a	n/a	n/a	n/a	n/a	n/a	n/a	n/a	n/a	n/a	n/a	n/a	n/a	n/a	n/a	n/a	n/a	n/a	n/a	n/a	500	n/a	n/a	n/a	n/a	n/a	n/a	n/a	n/a	71.6	4.9	116	0.5	8.9	7.8	8.8	126	0.5
Source 5	Container ship	Container ship 1	LOD		275	n/a	n/a	n/a	n/a	n/a	n/a	n/a	n/a	n/a	n/a	n/a	n/a	n/a	n/a	n/a	n/a	n/a	n/a	n/a	n/a	n/a	n/a	n/a	n/a	n/a	n/a	250	n/a	n/a	n/a	n/a	n/a	n/a	n/a	n/a	66	4.4	97.9	0.5	1	6.3	6.3	141	0.5
Source 5	Container ship	Container ship 2	LOD		275	n/a	n/a	n/a	n/a	n/a	n/a	n/a	n/a	n/a	n/a	n/a	n/a	n/a	n/a	n/a	n/a	n/a	n/a	n/a	n/a	n/a	n/a	n/a	n/a	n/a	n/a	700	n/a	n/a	n/a	n/a	n/a	n/a	n/a	n/a	15	1	2.2	0.5	1	1	3.8	26700	0.5
Source 5	Container ship	Container ship 2	LOD		275	n/a	n/a	n/a	n/a	n/a	n/a	n/a	n/a	n/a	n/a	n/a	n/a	n/a	n/a	n/a	n/a	n/a	n/a	n/a	n/a	n/a	n/a	n/a	n/a	n/a	n/a	640	n/a	n/a	n/a	n/a	n/a	n/a	n/a	n/a	15	1	1	0.5	1	1.2	4.6	14100	0.5
Source 5	Container ship	Container ship 2	LOD		275	n/a	n/a	n/a	n/a	n/a	n/a	n/a	n/a	n/a	n/a	n/a	n/a	n/a	n/a	n/a	n/a	n/a	n/a	n/a	n/a	n/a	n/a	n/a	n/a	n/a	n/a	1000	n/a	n/a	n/a	n/a	n/a	n/a	n/a	n/a	15	1	4	0.5	1	0.5	4.5	12800	0.5
Source 5	Container ship	Container ship 2	LOD		275	n/a	n/a	n/a	n/a	n/a	n/a	n/a	n/a	n/a	n/a	n/a	n/a	n/a	n/a	n/a	n/a	n/a	n/a	n/a	n/a	n/a	n/a	n/a	n/a	n/a	n/a	750	n/a	n/a	n/a	n/a	n/a	n/a	n/a	n/a	15	1	2.7	0.5	1	0.5	4.9	9930	0.5
Source 5	Container ship	Container ship 2	LOD		275	n/a	n/a	n/a	n/a	n/a	n/a	n/a	n/a	n/a	n/a	n/a	n/a	n/a	n/a	n/a	n/a	n/a	n/a	n/a	n/a	n/a	n/a	n/a	n/a	n/a	n/a	900	n/a	n/a	n/a	n/a	n/a	n/a	n/a	n/a	15	1	2	0.5	1	0.5	4.3	6890	0.5
Source 5	Container ship	Container ship 2	LOD		1300	n/a	n/a	n/a	n/a	n/a	n/a	n/a	n/a	n/a	n/a	n/a	n/a	n/a	n/a	n/a	n/a	n/a	n/a	n/a	n/a	n/a	n/a	n/a	n/a	n/a	n/a	780	n/a	n/a	n/a	n/a	n/a	n/a	n/a	n/a	15	1	2.3	0.5	1	1	4	6470	0.5
Source 5	Bulk carrier	Bulk carrier 3	LOD		560	n/a	n/a	n/a	n/a	n/a	n/a	n/a	n/a	n/a	n/a	n/a	n/a	n/a	n/a	n/a	n/a	n/a	n/a	n/a	n/a	n/a	n/a	n/a	n/a	n/a	n/a	2000	n/a	n/a	n/a	n/a	n/a	n/a	n/a	n/a	15	5.8	1	0.5	7.1	3.6	197	1740	9.9
Source 5	Bulk carrier	Bulk carrier 3	LOD		1600	n/a	n/a	n/a	n/a	n/a	n/a	n/a	n/a	n/a	n/a	n/a	n/a	n/a	n/a	n/a	n/a	n/a	n/a	n/a	n/a	n/a	n/a	n/a	n/a	n/a	n/a	2300	n/a	n/a	n/a	n/a	n/a	n/a	n/a	n/a	15	5.3	1	0.5	6.3	3.3	178	1730	9.1
Source 5	Bulk carrier	Bulk carrier 3	LOD		3100	n/a	n/a	n/a	n/a	n/a	n/a	n/a	n/a	n/a	n/a	n/a	n/a	n/a	n/a	n/a	n/a	n/a	n/a	n/a	n/a	n/a	n/a	n/a	n/a	n/a	n/a	2200	n/a	n/a	n/a	n/a	n/a	n/a	n/a	n/a	15	5.1	1	0.5	9.2	2.9	155	1800	11.7
Source 5	Bulk carrier	Bulk carrier 3	LOD		2000	n/a	n/a	n/a	n/a	n/a	n/a	n/a	n/a	n/a	n/a	n/a	n/a	n/a	n/a	n/a	n/a	n/a	n/a	n/a	n/a	n/a	n/a	n/a	n/a	n/a	n/a	2600	n/a	n/a	n/a	n/a	n/a	n/a	n/a	n/a	15	4.4	1	0.5	6.6	2.7	154	1800	9.1
Source 5	Bulk carrier	Bulk carrier 3	LOD		1400	n/a	n/a	n/a	n/a	n/a	n/a	n/a	n/a	n/a	n/a	n/a	n/a	n/a	n/a	n/a	n/a	n/a	n/a	n/a	n/a	n/a	n/a	n/a	n/a	n/a	n/a	2200	n/a	n/a	n/a	n/a	n/a	n/a	n/a	n/a	15	4.9	1	0.5	7.2	3.1	171	1760	9.4
Source 5	Bulk carrier	Bulk carrier 3	LOD		1500	n/a	n/a	n/a	n/a	n/a	n/a	n/a	n/a	n/a	n/a	n/a	n/a	n/a	n/a	n/a	n/a	n/a	n/a	n/a	n/a	n/a	n/a	n/a	n/a	n/a	n/a	2000	n/a	n/a	n/a	n/a	n/a	n/a	n/a	n/a	15	5.7	1	0.5	8.1	3.4	180	1790	10.5
Source 3	OWS	System A	LOD		261.429	n/a	n/a	n/a	n/a	n/a	n/a	n/a	n/a	n/a	n/a	n/a	n/a	n/a	n/a	n/a	n/a	n/a	n/a	n/a	n/a	n/a	n/a	n/a	n/a	n/a	n/a	n/a	n/a	n/a	n/a	n/a	n/a	n/a	n/a	n/a	n/a	n/a	n/a	n/a	n/a	n/a	n/a	n/a	n/a
Source 3	OWS	System B	LOD		5015.22	n/a	n/a	n/a	n/a	n/a	n/a	n/a	n/a	n/a	n/a	n/a	n/a	n/a	n/a	n/a	n/a	n/a	n/a	n/a	n/a	n/a	n/a	n/a	n/a	n/a	n/a	n/a	n/a	n/a	n/a	n/a	n/a	n/a	n/a	n/a	n/a	n/a	n/a	n/a	n/a	n/a	n/a	n/a	n/a
Source 3	OWS	System C	LOD		488.462	n/a	n/a	n/a	n/a	n/a	n/a	n/a	n/a	n/a	n/a	n/a	n/a	n/a	n/a	n/a	n/a	n/a	n/a	n/a	n/a	n/a	n/a	n/a	n/a	n/a	n/a	n/a	n/a	n/a	n/a	n/a	n/a	n/a	n/a	n/a	n/a	n/a	n/a	n/a	n/a	n/a	n/a	n/a	n/a
Source 3	OWS	System D	LOD		2905.41	n/a	n/a	n/a	n/a	n/a	n/a	n/a	n/a	n/a	n/a	n/a	n/a	n/a	n/a	n/a	n/a	n/a	n/a	n/a	n/a	n/a	n/a	n/a	n/a	n/a	n/a	n/a	n/a	n/a	n/a	n/a	n/a	n/a	n/a	n/a	n/a	n/a	n/a	n/a	n/a	n/a	n/a	n/a	n/a
Source 3	OWS	System E	LOD		6868.75	n/a	n/a	n/a	n/a	n/a	n/a	n/a	n/a	n/a	n/a	n/a	n/a	n/a	n/a	n/a	n/a	n/a	n/a	n/a	n/a	n/a	n/a	n/a	n/a	n/a	n/a	n/a	n/a	n/a	n/a	n/a	n/a	n/a	n/a	n/a	n/a	n/a	n/a	n/a	n/a	n/a	n/a	n/a	n/a
Source 3	OWS	System F	LOD		500	n/a	n/a	n/a	n/a	n/a	n/a	n/a	n/a	n/a	n/a	n/a	n/a	n/a	n/a	n/a	n/a	n/a	n/a	n/a	n/a	n/a	n/a	n/a	n/a	n/a	n/a	n/a	n/a	n/a	n/a	n/a	n/a	n/a	n/a	n/a	n/a	n/a	n/a	n/a	n/a	n/a	n/a	n/a	n/a
Source 3	OWS	System G	LOD		500	n/a	n/a	n/a	n/a	n/a	n/a	n/a	n/a	n/a	n/a	n/a	n/a	n/a	n/a	n/a	n/a	n/a	n/a	n/a	n/a	n/a	n/a	n/a	n/a	n/a	n/a	n/a	n/a	n/a	n/a	n/a	n/a	n/a	n/a	n/a	n/a	n/a	n/a	n/a	n/a	n/a	n/a	n/a	n/a
Source 3	OWS	System H	LOD		6444.44	n/a	n/a	n/a	n/a	n/a	n/a	n/a	n/a	n/a	n/a	n/a	n/a	n/a	n/a	n/a	n/a	n/a	n/a	n/a	n/a	n/a	n/a	n/a	n/a	n/a	n/a	n/a	n/a	n/a	n/a	n/a	n/a	n/a	n/a	n/a	n/a	n/a	n/a	n/a	n/a	n/a	n/a	n/a	n/a
Source 3	OWS	System I	LOD		168.889	n/a	n/a	n/a	n/a	n/a	n/a	n/a	n/a	n/a	n/a	n/a	n/a	n/a	n/a	n/a	n/a	n/a	n/a	n/a	n/a	n/a	n/a	n/a	n/a	n/a	n/a	n/a	n/a	n/a	n/a	n/a	n/a	n/a	n/a	n/a	n/a	n/a	n/a	n/a	n/a	n/a	n/a	n/a	n/a
Source 3	OWS	System J	LOD		1072.78	n/a	n/a	n/a	n/a	n/a	n/a	n/a	n/a	n/a	n/a	n/a	n/a	n/a	n/a	n/a	n/a	n/a	n/a	n/a	n/a	n/a	n/a	n/a	n/a	n/a	n/a	n/a	n/a	n/a	n/a	n/a	n/a	n/a	n/a	n/a	n/a	n/a	n/a	n/a	n/a	n/a	n/a	n/a	n/a
Source 3	OWS	System K	LOD		61.1111	n/a	n/a	n/a	n/a	n/a	n/a	n/a	n/a	n/a	n/a	n/a	n/a	n/a	n/a	n/a	n/a	n/a	n/a	n/a	n/a	n/a	n/a	n/a	n/a	n/a	n/a	n/a	n/a	n/a	n/a	n/a	n/a	n/a	n/a	n/a	n/a	n/a	n/a	n/a	n/a	n/a	n/a	n/a	n/a
Source 3	OWS	System L	LOD		2002	n/a	n/a	n/a	n/a	n/a	n/a	n/a	n/a	n/a	n/a	n/a	n/a	n/a	n/a	n/a	n/a	n/a	n/a	n/a	n/a	n/a	n/a	n/a	n/a	n/a	n/a	n/a	n/a	n/a	n/a	n/a	n/a	n/a	n/a	n/a	n/a	n/a	n/a	n/a	n/a	n/a	n/a	n/a	n/a
Source 3	OWS	System M	LOD		287.778	n/a	n/a	n/a	n/a	n/a	n/a	n/a	n/a	n/a	n/a	n/a	n/a	n/a	n/a	n/a	n/a	n/a	n/a	n/a	n/a	n/a	n/a	n/a	n/a	n/a	n/a	n/a	n/a	n/a	n/a	n/a	n/a	n/a	n/a	n/a	n/a	n/a	n/a	n/a	n/a	n/a	n/a	n/a	n/a
Source 6	Ore carrier		no		5200	n/a	n/a	n/a	n/a	n/a	n/a	n/a	n/a	n/a	n/a	n/a	n/a	n/a	n/a	n/a	n/a	n/a	n/a	n/a	n/a	n/a	n/a	n/a	n/a	n/a	n/a	n/a	n/a	n/a	n/a	n/a	n/a	n/a	n/a	n/a	n/a	n/a	n/a	n/a	n/a	n/a	n/a	n/a	n/a
Source 6	RoPax		no		6000	n/a	n/a	n/a	n/a	n/a	n/a	n/a	n/a	n/a	n/a	n/a	n/a	n/a	n/a	n/a	n/a	n/a	n/a	n/a	n/a	n/a	n/a	n/a	n/a	n/a	n/a	n/a	n/a	n/a	n/a	n/a	n/a	n/a	n/a	n/a	n/a	n/a	n/a	n/a	n/a	n/a	n/a	n/a	n/a
Source 6	RoPax		no		7600	n/a	n/a	n/a	n/a	n/a	n/a	n/a	n/a	n/a	n/a	n/a	n/a	n/a	n/a	n/a	n/a	n/a	n/a	n/a	n/a	n/a	n/a	n/a	n/a	n/a	n/a	n/a	n/a	n/a	n/a	n/a	n/a	n/a	n/a	n/a	n/a	n/a	n/a	n/a	n/a	n/a	n/a	n/a	n/a
			Average		3289.09	169.831	497.438	4641.5	1035.06	50.587	0.287812	1.41969	3.33162	3.67387	0.220688	0.595875	1.22719	0.0975625	0.171437	0.0896875	0.030625	0.102313	0.0209375	0.12925	0.052	61.8348	0.44625	61.8279	51.9148	8.93919	0.548438	3117.81	890.714	2477.14	2.46455	15.4018	5.52636	26.5309	162.539	330.627	29.4412	6.98235	35.9129	0.319355	16.3	20.3872	49.7437	2843.44	3.00645
			Stdev		9927.55	211.559	1027.3	13129.5	2719.23	70.0588	0.352172	1.76152	4.95885	5.12444	0.283581	1.95129	2.70985	0.244913	0.516334	0.271716	0.0706842	0.320716	0.032053	0.31797	0.136156	81.009	1.30251	81.0144	70.9323	13.966	1.57567	3919.8	845.431	4122.08	3.90193	26.8458	7.35192	37.5943	446.082	818.824	23.4925	9.83013	94.3635	0.202352	44.4397	64.0305	66.1649	5864.39	3.54814
			95% CI lower		509.425	66.1692	-5.92826	-1791.83	-297.335	16.2588	0.115251	0.556557	0.901833	1.16295	0.0817354	-0.360239	-0.100615	-0.0224428	-0.0815617	-0.043451	-0.0040096	-0.0548353	0.00523181	-0.0265523	-0.0147151	22.1411	-0.191968	22.1316	17.1586	2.09596	-0.223627	1759.7	264.422	-576.482	0.158695	-0.462764	1.18174	4.31448	-101.074	-153.258	18.2738	2.30949	2.69508	0.248123	0.902697	-1.79785	26.8192	779.061	1.75744
			95% CI upper		6068.75	273.493	1000.8	11074.8	2367.46	84.9152	0.460374	2.28282	5.76142	6.1848	0.35964	1.55199	2.55499	0.217568	0.424437	0.222826	0.0652596	0.25946	0.0366432	0.285052	0.118715	101.528	1.08447	101.524	86.6711	15.7824	1.3205	4475.93	1517.01	5530.77	4.7704	31.2664	9.87099	48.7473	426.152	814.512	40.6086	11.6552	69.1307	0.390587	31.6973	42.5722	72.6683	4907.83	4.25547
			analyzed sampels		49	16	16	16	16	16	16	16	16	16	16	16	16	16	16	16	16	16	16	16	16	16	16	16	16	16	16	32	7	7	11	11	11	11	11	11	17	17	31	31	32	32	32	31	31
[truncated: 22 more columns]

## Sheet: Bilge water references
References
1	Tiselius, P., and K. Magnusson. 2017. Toxicity of treated bilge water: The need for revised regulatory control. Marine Pollution Bulletin 114:860-866.
3	US EPA. 2011. Oily Bilgewater Separators. EPA 800-R-11-007.
5	McLaughlin, C., D. Falatko, R. Danesi, and R. Albert. 2014. Characterizing shipboard bilgewater effluent before and after treatment. Environmental Science and Pollution Research 21:5637-5652.
6	Penny, R. L., and M. Suominen-Yeh. 2006. Biological Bilge Water Treatment System. Naval Engineers Journal 118:45-50.

[truncated: 8 more sheets: Sewage metals, Sewage organic compounds, Sewage references, Grey water metals, Grey water organic compounds, Grey water References, Scrubber water, Scrubber water references]
